# Supplementary material for: Microbial species delineation using whole genome sequences
Source: PubMed Central journal article supplement (PMC4538840; doi:10.1093/nar/gkv657), 2015-07-06
Supplement: supp_gkv657_nar-03569-n-2014-File007.pdf [file supp_gkv657_nar-03569-n-2014-File007.pdf]

Dataset S1: The 326 genomes (highlighted in red) with incomplete classification (sp. Or unclassified) that can be assigned to species based on their clique membership.

| Cluster ID | Cluster Type | IMG Taxon ID | Species                                  | Taxon Display Name                                      |
|------------|--------------|--------------|------------------------------------------|---------------------------------------------------------|
| 3          | clique       | 2547132273   | <i>Escherichia</i> sp.                   | <i>Escherichia</i> sp. TW15838                          |
| 3          | clique       | 2547132275   | <i>Escherichia</i> sp.                   | <i>Escherichia</i> sp. TW10509                          |
| 3          | clique       | 2534681675   | <i>Escherichia coli</i>                  | <i>Escherichia coli</i> O2:H4 1.2741                    |
| 3          | clique       | 2534682161   | <i>Escherichia coli</i>                  | <i>Escherichia coli</i> STEC_7v                         |
| 4          | clique       | 648276711    | <i>Peptoniphilus</i> sp.                 | <i>Peptoniphilus</i> sp. F0141                          |
| 4          | clique       | 647000289    | <i>Peptoniphilus lacrimalis</i>          | <i>Peptoniphilus lacrimalis</i> 315-B                   |
| 4          | clique       | 251989691    | <i>Peptoniphilus lacrimalis</i>          | <i>Peptoniphilus lacrimalis</i> DSM 7455                |
| 12         | clique       | 2541047518   | <i>Clostridium</i> sp.                   | <i>Clostridium bifermentans</i> ATCC 638                |
| 12         | clique       | 2541047517   | <i>Clostridium bifermentans</i>          | <i>Clostridium bifermentans</i> ATCC 19299              |
| 13         | clique       | 649633021    | <i>Burkholderia</i> sp.                  | <i>Burkholderia</i> sp. CCGE1001                        |
| 13         | clique       | 2526164713   | <i>Burkholderia</i> sp.                  | <i>Burkholderia</i> sp. JPY366                          |
| 13         | clique       | 2518645580   | <i>Burkholderia phenoliruptrix</i>       | <i>Burkholderia phenoliruptrix</i> BR3459               |
| 13         | clique       | 2554235175   | <i>Burkholderia phenoliruptrix</i>       | <i>Burkholderia phenoliruptrix</i> AC1100               |
| 16         | clique       | 2541046973   | <i>Bacteroidetes</i> sp.                 | <i>Bacteroidetes</i> sp. F0290                          |
| 16         | clique       | 2556793004   | <i>Phocaeicola abscessus</i>             | <i>Phocaeicola abscessus</i> CCUG 55929                 |
| 20         | clique       | 2531839610   | <i>Thermotoga</i> sp.                    | <i>Thermotoga</i> sp. EMP                               |
| 20         | clique       | 637000321    | <i>Thermotoga maritima</i>               | <i>Thermotoga maritima</i> MSB8                         |
| 20         | clique       | 251989531    | <i>Thermotoga maritima</i>               | <i>Thermotoga maritima</i> MSB8, DSM 3109               |
| 20         | clique       | 2554235387   | <i>Thermotoga maritima</i>               | <i>Thermotoga maritima</i> MSB8                         |
| 32         | clique       | 2551306100   | <i>Bacillus</i> sp.                      | <i>Bacillus</i> sp. CPSM8                               |
| 32         | clique       | 2554235236   | <i>Bacillus</i> sp.                      | <i>Bacillus</i> sp. SB47                                |
| 32         | clique       | 2551306715   | <i>Bacillus licheniformis</i>            | <i>Bacillus licheniformis</i> 9945A                     |
| 41         | clique       | 649989958    | unclassified                             | Lachnospiraceae bacterium sp. 8_1_57FAA                 |
| 41         | clique       | 651324046    | unclassified                             | Lachnospiraceae bacterium 1_1_57FAA                     |
| 41         | clique       | 651324050    | unclassified                             | Lachnospiraceae bacterium 3_1_46FAA                     |
| 41         | clique       | 640963025    | <i>Ruminococcus torques</i>              | <i>Ruminococcus torques</i> ATCC 27756                  |
| 45         | clique       | 2551306542   | unclassified                             | <i>Herbaspirillum</i> sp. B65                           |
| 45         | clique       | 2551306545   | unclassified                             | <i>Herbaspirillum</i> sp. B501                          |
| 45         | clique       | 2551306410   | <i>Herbaspirillum seropedicae</i>        | <i>Herbaspirillum seropedicae</i> Os45                  |
| 45         | clique       | 2551306416   | <i>Herbaspirillum seropedicae</i>        | <i>Herbaspirillum seropedicae</i> Os34                  |
| 46         | clique       | 646206273    | <i>Bacteroides</i> sp.                   | <i>Bacteroides</i> sp. 3_2_5                            |
| 46         | clique       | 647533110    | <i>Bacteroides</i> sp.                   | <i>Bacteroides</i> sp. 2_1_16                           |
| 46         | clique       | 651324014    | <i>Bacteroides</i> sp.                   | <i>Bacteroides</i> sp. 2_1_56FAA                        |
| 46         | clique       | 637000024    | <i>Bacteroides fragilis</i>              | <i>Bacteroides fragilis</i> NCTC 9343                   |
| 46         | clique       | 637000025    | <i>Bacteroides fragilis</i>              | <i>Bacteroides fragilis</i> YCH46                       |
| 46         | clique       | 650377910    | <i>Bacteroides fragilis</i>              | <i>Bacteroides fragilis</i> 638R                        |
| 46         | clique       | 2531839304   | <i>Bacteroides fragilis</i>              | <i>Bacteroides fragilis</i> CL03T12C07                  |
| 46         | clique       | 2531839305   | <i>Bacteroides fragilis</i>              | <i>Bacteroides fragilis</i> CL07T00C01                  |
| 46         | clique       | 2531839306   | <i>Bacteroides fragilis</i>              | <i>Bacteroides fragilis</i> CL07T12C05                  |
| 46         | clique       | 2534681944   | <i>Bacteroides fragilis</i>              | <i>Bacteroides fragilis</i> HMW 615                     |
| 46         | clique       | 2537561570   | <i>Bacteroides fragilis</i>              | <i>Bacteroides fragilis</i> CL05T12C13                  |
| 46         | clique       | 2537562066   | <i>Bacteroides fragilis</i>              | <i>Bacteroides fragilis</i> CL03T00C08                  |
| 47         | clique       | 2554235436   | <i>Candidatus Portiera</i> sp.           | <i>Candidatus Portiera aleyrodidarum</i> BT-B-HRs       |
| 47         | clique       | 2517093038   | <i>Candidatus Portiera aleyrodidarum</i> | <i>Candidatus Portiera aleyrodidarum</i> BT-B           |
| 47         | clique       | 2518645538   | <i>Candidatus Portiera aleyrodidarum</i> | <i>Candidatus Portiera aleyrodidarum</i> BT-Q-AWRs      |
| 47         | clique       | 2522572174   | <i>Candidatus Portiera aleyrodidarum</i> | <i>Candidatus Portiera aleyrodidarum</i> BT-QVLC        |
| 57         | clique       | 2548877023   | <i>Chlorogloeopsis</i> sp.               | <i>Chlorogloeopsis</i> sp. PCC 9212                     |
| 57         | clique       | 2509601037   | <i>Chlorogloeopsis fritschii</i>         | <i>Chlorogloeopsis fritschii</i> PCC 6912 (CLC Draft 2) |
| 57         | clique       | 2551306142   | <i>Chlorogloeopsis fritschii</i>         | <i>Chlorogloeopsis fritschii</i> PCC 6912               |
| 66         | clique       | 2551306396   | <i>Paenibacillus</i> sp.                 | <i>Paenibacillus</i> sp. ICGEB2008                      |
| 66         | clique       | 2547132099   | <i>Paenibacillus polymyxa</i>            | <i>Paenibacillus polymyxa</i> N.R. Smith 1105, ATCC 842 |
| 66         | clique       | 2548876929   | <i>Paenibacillus polymyxa</i>            | <i>Paenibacillus polymyxa</i> OSY-DF                    |
| 67         | clique       | 2510065002   | <i>Arsenophonus</i> sp.                  | <i>Arsenophonus</i> sp. ArN                             |
| 67         | clique       | 2524614872   | <i>Arsenophonus nasoniae</i>             | <i>Arsenophonus nasoniae</i> DSM 15247                  |
| 68         | clique       | 2554235432   | <i>Haemophilus</i> sp.                   | <i>Haemophilus parasuis</i> ZJ0906                      |
| 68         | clique       | 641736156    | <i>Haemophilus parasuis</i>              | <i>Haemophilus parasuis</i> 29755                       |
| 68         | clique       | 643348556    | <i>Haemophilus parasuis</i>              | <i>Haemophilus parasuis</i> SH0165                      |
| 68         | clique       | 2541047150   | <i>Haemophilus parasuis</i>              | <i>Haemophilus parasuis</i> gx033                       |
| 70         | clique       | 2545824642   | <i>Lactobacillus</i> sp.                 | <i>Lactobacillus rhamnosus</i> LOCK900                  |
| 70         | clique       | 2554235437   | <i>Lactobacillus</i> sp.                 | <i>Lactobacillus rhamnosus</i> LOCK908                  |
| 70         | clique       | 642979366    | <i>Lactobacillus rhamnosus</i>           | <i>Lactobacillus rhamnosus</i> HN001                    |
| 70         | clique       | 643886127    | <i>Lactobacillus rhamnosus</i>           | <i>Lactobacillus rhamnosus</i> LMS2-1                   |
| 70         | clique       | 644736382    | <i>Lactobacillus rhamnosus</i>           | <i>Lactobacillus rhamnosus</i> GG                       |
| 70         | clique       | 644736383    | <i>Lactobacillus rhamnosus</i>           | <i>Lactobacillus rhamnosus</i> Lc 705                   |
| 70         | clique       | 646862332    | <i>Lactobacillus rhamnosus</i>           | <i>Lactobacillus rhamnosus</i> GG, ATCC 53103           |
| 70         | clique       | 2511231185   | <i>Lactobacillus rhamnosus</i>           | <i>Lactobacillus rhamnosus</i> K, ATCC 8530             |
| 70         | clique       | 2519899592   | <i>Lactobacillus rhamnosus</i>           | <i>Lactobacillus rhamnosus</i> LRHMDP3                  |
| 70         | clique       | 2519899593   | <i>Lactobacillus rhamnosus</i>           | <i>Lactobacillus rhamnosus</i> LRHMDP2                  |
| 70         | clique       | 2529293053   | <i>Lactobacillus rhamnosus</i>           | <i>Lactobacillus rhamnosus</i> R0011                    |
| 70         | clique       | 2534681855   | <i>Lactobacillus rhamnosus</i>           | <i>Lactobacillus rhamnosus</i> ATCC 21052               |
| 70         | clique       | 2554235212   | <i>Lactobacillus rhamnosus</i>           | <i>Lactobacillus rhamnosus</i> CRL1505                  |
| 71         | clique       | 2509276012   | <i>Bacillus</i> sp.                      | <i>Bacillus</i> sp. J13                                 |
| 71         | clique       | 2506783046   | <i>Paenibacillus lactis</i>              | <i>Paenibacillus lactis</i> 154                         |
| 72         | clique       | 647533209    | <i>Ruegeria</i> sp.                      | <i>Ruegeria</i> sp. TrichCH4B                           |
| 72         | clique       | 2504756012   | <i>Ruegeria mobilis</i>                  | <i>Ruegeria mobilis</i> 45A6                            |
| 72         | clique       | 2534682167   | <i>Ruegeria mobilis</i>                  | <i>Ruegeria mobilis</i> F1926                           |
| 74         | clique       | 2541047020   | <i>Microbacterium</i> sp.                | <i>Microbacterium</i> sp. oral taxon 186 F0373          |
| 74         | clique       | 2531839539   | <i>Microbacterium laevaniformans</i>     | <i>Microbacterium laevaniformans</i> OR221              |
| 75         | clique       | 2545824768   | <i>Lactobacillus</i> sp.                 | <i>Lactobacillus plantarum</i> IPLA88                   |
| 75         | clique       | 637000141    | <i>Lactobacillus plantarum</i>           | <i>Lactobacillus plantarum</i> WCF51                    |
| 75         | clique       | 643886053    | <i>Lactobacillus plantarum</i>           | <i>Lactobacillus plantarum</i> ATCC 14917               |
| 75         | clique       | 644736381    | <i>Lactobacillus plantarum</i>           | <i>Lactobacillus plantarum</i> JDM1                     |

|            |            |                                         |                                                                 |
|------------|------------|-----------------------------------------|-----------------------------------------------------------------|
| 75 clique  | 648028037  | <i>Lactobacillus plantarum</i>          | <i>Lactobacillus plantarum plantarum</i> ST-III                 |
| 75 clique  | 2505119027 | <i>Lactobacillus plantarum</i>          | <i>Lactobacillus plantarum</i> VBLLa 11-47                      |
| 75 clique  | 2521172735 | <i>Lactobacillus plantarum</i>          | <i>Lactobacillus plantarum plantarum</i> NCS                    |
| 75 clique  | 2540341093 | <i>Lactobacillus plantarum</i>          | <i>Lactobacillus plantarum</i> ZJ316                            |
| 75 clique  | 2554235316 | <i>Lactobacillus plantarum</i>          | <i>Lactobacillus plantarum plantarum</i> P8                     |
| 98 clique  | 2531839270 | <i>Klebsiella</i> sp.                   | <i>Klebsiella</i> sp. OBRC7                                     |
| 98 clique  | 2511231124 | <i>Klebsiella oxytoca</i>               | <i>Klebsiella oxytoca</i> KCTC 1686                             |
| 98 clique  | 2518645552 | <i>Klebsiella oxytoca</i>               | <i>Klebsiella oxytoca</i> E718                                  |
| 98 clique  | 2531839401 | <i>Klebsiella oxytoca</i>               | <i>Klebsiella oxytoca</i> 10-5242                               |
| 100 clique | 2540341040 | <i>Pseudoalteromonas</i> sp.            | <i>Pseudoalteromonas</i> sp. BSI20429                           |
| 100 clique | 2541047156 | <i>Pseudoalteromonas arctica</i>        | <i>Pseudoalteromonas arctica</i> A 37-1-2                       |
| 108 clique | 651324053  | unclassified                            | <i>Lachnospiraceae</i> bacterium 5_1_57FAA                      |
| 108 clique | 641736197  | <i>Clostridium scindens</i>             | <i>Clostridium scindens</i> ATCC 35704                          |
| 110 clique | 2529293266 | <i>Bacteroides</i> sp.                  | <i>Bacteroides</i> sp. HPS0048                                  |
| 110 clique | 2537561664 | <i>Bacteroides nordii</i>               | <i>Bacteroides nordii</i> CL02T12C05                            |
| 113 clique | 2537561888 | <i>Eubacterium</i> sp.                  | <i>Eubacterium</i> sp. AS15                                     |
| 113 clique | 648276673  | <i>Eubacterium yurii</i>                | <i>Eubacterium yurii</i> margaretae ATCC 43715                  |
| 115 clique | 643692015  | <i>Chloroflexus</i> sp.                 | <i>Chloroflexus</i> sp. Y-400-fl                                |
| 115 clique | 641228485  | <i>Chloroflexus aurantiacus</i>         | <i>Chloroflexus aurantiacus</i> J-10-fl                         |
| 120 clique | 649633088  | <i>Rahnella</i> sp.                     | <i>Rahnella</i> sp. Y9602                                       |
| 120 clique | 2513237194 | <i>Rahnella aquatilis</i>               | <i>Rahnella aquatilis</i> HX2                                   |
| 121 clique | 651324054  | unclassified                            | <i>Lachnospiraceae</i> bacterium 6_1_63FAA                      |
| 121 clique | 643886146  | <i>Blautia hansenii</i>                 | <i>Blautia hansenii</i> VPI C7-24, DSM 20583                    |
| 130 clique | 651324019  | <i>Capnocytophaga</i> sp.               | <i>Capnocytophaga</i> sp. oral taxon 329 F0087                  |
| 130 clique | 2513237390 | <i>Paraprevotella clara</i>             | <i>Paraprevotella clara</i> YIT 11840                           |
| 133 clique | 2511231094 | <i>Pseudogulbenkiania</i> sp.           | <i>Pseudogulbenkiania</i> sp. NH8B                              |
| 133 clique | 643886068  | <i>Pseudogulbenkiania ferrooxidans</i>  | <i>Pseudogulbenkiania ferrooxidans</i> 2002                     |
| 136 clique | 647000294  | <i>Prevotella</i> sp.                   | <i>Prevotella</i> sp. F0295                                     |
| 136 clique | 2518645604 | <i>Prevotella loeschii</i>              | <i>Prevotella loeschii</i> DSM 19665                            |
| 137 clique | 64989930   | <i>Eggerthella</i> sp.                  | <i>Eggerthella</i> sp. 1_3_56FAA                                |
| 137 clique | 651324028  | <i>Eggerthella</i> sp.                  | <i>Eggerthella</i> sp. HGA1                                     |
| 137 clique | 644736358  | <i>Eggerthella lenta</i>                | <i>Eggerthella lenta</i> VPI 0255, DSM 2243                     |
| 140 clique | 2513237299 | <i>Synergistes</i> sp.                  | <i>Synergistes</i> sp. 3_1_syn1                                 |
| 140 clique | 2510065052 | <i>Cloacibacillus evryensis</i>         | <i>Cloacibacillus evryensis</i> 158, DSM 19522                  |
| 144 clique | 2521172563 | <i>Thioalkalivibrio</i> sp.             | <i>Thioalkalivibrio</i> sp. ARh5                                |
| 144 clique | 2523231052 | <i>Thioalkalivibrio</i> sp.             | <i>Thioalkalivibrio</i> sp. ARh3                                |
| 144 clique | 2519899645 | <i>Thioalkalivibrio thiocyanoxidans</i> | <i>Thioalkalivibrio thiocyanoxidans</i> ARh2                    |
| 146 clique | 2524614702 | <i>Dorea</i> sp.                        | <i>Dorea</i> sp. AGR2135                                        |
| 146 clique | 641736133  | <i>Dorea formicigenerans</i>            | <i>Dorea formicigenerans</i> ATCC 27755                         |
| 146 clique | 2513237343 | <i>Dorea formicigenerans</i>            | <i>Dorea formicigenerans</i> 4_6_53AFAA                         |
| 147 clique | 646206262  | <i>Fusobacterium</i> sp.                | <i>Fusobacterium</i> sp. 2_1_31                                 |
| 147 clique | 2534681820 | <i>Fusobacterium periodonticum</i>      | <i>Fusobacterium periodonticum</i> D10                          |
| 168 clique | 647533241  | <i>Veillonella</i> sp.                  | <i>Veillonella</i> sp. 3_1_44                                   |
| 168 clique | 647533242  | <i>Veillonella</i> sp.                  | <i>Veillonella</i> sp. 6_1_27                                   |
| 168 clique | 647000331  | <i>Veillonella parvula</i>              | <i>Veillonella parvula</i> ATCC 17745                           |
| 170 clique | 2519899624 | <i>Citrobacter</i> sp.                  | <i>Citrobacter</i> sp. A1                                       |
| 170 clique | 2519899729 | <i>Citrobacter</i> sp.                  | <i>Citrobacter</i> sp. L17                                      |
| 170 clique | 2519899575 | <i>Citrobacter freundii</i>             | <i>Citrobacter freundii</i> ATCC 8090                           |
| 170 clique | 2531839651 | <i>Citrobacter freundii</i>             | <i>Citrobacter freundii</i> GTC 09479                           |
| 170 clique | 2534682223 | <i>Citrobacter freundii</i>             | <i>Citrobacter freundii</i> GTC 09629                           |
| 177 clique | 2522125170 | <i>Microbacterium</i> sp.               | <i>Microbacterium</i> sp. 11MF                                  |
| 177 clique | 2521172614 | <i>Microbacterium paraoxydans</i>       | <i>Microbacterium paraoxydans</i> 77MFTsu3.2                    |
| 181 clique | 2513237322 | <i>Bilophila</i> sp.                    | <i>Bilophila</i> sp. 4_1_30                                     |
| 181 clique | 64989917   | <i>Bilophila wadsworthia</i>            | <i>Bilophila wadsworthia</i> 3_1_6                              |
| 187 clique | 651324080  | <i>Paenibacillus</i> sp.                | <i>Paenibacillus</i> sp. HGF5                                   |
| 187 clique | 646311929  | <i>Paenibacillus lautus</i>             | <i>Paenibacillus lautus</i> Y412MC10                            |
| 203 clique | 2512047053 | <i>Alistipes</i> sp.                    | <i>Alistipes</i> sp. HGB5                                       |
| 203 clique | 2509601035 | <i>Alistipes finegoldii</i>             | <i>Alistipes finegoldii</i> AHN 2437, DSM 17242                 |
| 221 clique | 643886056  | <i>Acidaminococcus</i> sp.              | <i>Acidaminococcus</i> sp. D21                                  |
| 221 clique | 2541047012 | <i>Acidaminococcus</i> sp.              | <i>Acidaminococcus</i> sp. HPA0509                              |
| 221 clique | 2511231106 | <i>Acidaminococcus intestini</i>        | <i>Acidaminococcus intestini</i> RyC-MR95                       |
| 221 clique | 2524614855 | <i>Acidaminococcus intestini</i>        | <i>Acidaminococcus intestini</i> DSM 21505                      |
| 223 clique | 643692055  | <i>Wolbachia</i> sp.                    | <i>Wolbachia</i> sp. wRI                                        |
| 223 clique | 2540341171 | <i>Wolbachia</i> sp.                    | <i>Wolbachia</i> endosymbiont of <i>Drosophila simulans</i> wHa |
| 223 clique | 637000339  | <i>Wolbachia endosymbiont</i>           | <i>Wolbachia</i> endosymbiont of <i>Drosophila melanogaster</i> |
| 225 clique | 2529293077 | <i>Slackia</i> sp.                      | <i>Slackia</i> sp. CM382                                        |
| 225 clique | 645951837  | <i>Slackia exigua</i>                   | <i>Slackia exigua</i> ATCC 700122                               |
| 233 clique | 2531839536 | <i>Acinetobacter</i> sp.                | <i>Acinetobacter</i> sp. NBRC 100985                            |
| 233 clique | 2551306081 | <i>Acinetobacter venetianus</i>         | <i>Acinetobacter venetianus</i> RAG-1                           |
| 233 clique | 2551306104 | <i>Acinetobacter venetianus</i>         | <i>Acinetobacter venetianus</i> VE-C3                           |
| 237 clique | 647000328  | <i>Streptomyces</i> sp.                 | <i>Streptomyces griseus</i> XyelbKG-1 1                         |
| 237 clique | 641522653  | <i>Streptomyces griseus</i>             | <i>Streptomyces griseus</i> griseus NBRC 13350                  |
| 243 clique | 646206251  | <i>Coprobacillus</i> sp.                | <i>Coprobacillus</i> sp. D7                                     |
| 243 clique | 2513237364 | <i>Coprobacillus</i> sp.                | <i>Coprobacillus</i> sp. 8_2_54BFAA                             |
| 243 clique | 2513237376 | <i>Coprobacillus</i> sp.                | <i>Coprobacillus</i> sp. 3_3_56FAA                              |
| 243 clique | 641736198  | <i>Clostridium ramosum</i>              | <i>Clostridium ramosum</i> VPI 0427, DSM 1402                   |
| 254 clique | 651324091  | <i>Propionibacterium</i> sp.            | <i>Propionibacterium</i> sp. 409-HC1                            |
| 254 clique | 651324092  | <i>Propionibacterium</i> sp.            | <i>Propionibacterium</i> sp. 434-HC2                            |
| 254 clique | 2512047068 | <i>Propionibacterium</i> sp.            | <i>Propionibacterium</i> sp. CC003-HC2                          |
| 254 clique | 2513237388 | <i>Propionibacterium</i> sp.            | <i>Propionibacterium</i> sp. 5_U_42AFAA                         |
| 254 clique | 637000215  | <i>Propionibacterium acnes</i>          | <i>Propionibacterium acnes</i> KPA171202                        |
| 254 clique | 646564561  | <i>Propionibacterium acnes</i>          | <i>Propionibacterium acnes</i> SK137                            |
| 254 clique | 647000296  | <i>Propionibacterium acnes</i>          | <i>Propionibacterium acnes</i> J139                             |
| 254 clique | 647000297  | <i>Propionibacterium acnes</i>          | <i>Propionibacterium acnes</i> J165                             |
| 254 clique | 647000298  | <i>Propionibacterium acnes</i>          | <i>Propionibacterium acnes</i> SK187                            |

|            |            |                         |                                             |
|------------|------------|-------------------------|---------------------------------------------|
| 254 clique | 651053058  | Propionibacterium acnes | Propionibacterium acnes 266                 |
| 254 clique | 651053059  | Propionibacterium acnes | Propionibacterium acnes 6609                |
| 254 clique | 2511231063 | Propionibacterium acnes | Propionibacterium acnes TypeIA2 P.acn33     |
| 254 clique | 2511231095 | Propionibacterium acnes | Propionibacterium acnes TypeIA2 P.acn31     |
| 254 clique | 2511231125 | Propionibacterium acnes | Propionibacterium acnes TypeIA2 P.acn17     |
| 254 clique | 2511231219 | Propionibacterium acnes | Propionibacterium acnes ATCC 11828          |
| 254 clique | 2515154214 | Propionibacterium acnes | Propionibacterium acnes DSM 1897            |
| 254 clique | 2516143011 | Propionibacterium acnes | Propionibacterium acnes PRP-38              |
| 254 clique | 2522572173 | Propionibacterium acnes | Propionibacterium acnes C1                  |
| 254 clique | 2529292840 | Propionibacterium acnes | Propionibacterium acnes HL002PA2            |
| 254 clique | 2529292847 | Propionibacterium acnes | Propionibacterium acnes HL063PA2            |
| 254 clique | 2529292952 | Propionibacterium acnes | Propionibacterium acnes HL082PA2            |
| 254 clique | 2531839222 | Propionibacterium acnes | Propionibacterium acnes HL045PA1            |
| 254 clique | 2531839223 | Propionibacterium acnes | Propionibacterium acnes HL013PA1            |
| 254 clique | 2531839225 | Propionibacterium acnes | Propionibacterium acnes HL020PA1            |
| 254 clique | 2531839226 | Propionibacterium acnes | Propionibacterium acnes HL053PA2            |
| 254 clique | 2531839313 | Propionibacterium acnes | Propionibacterium acnes HL087PA2            |
| 254 clique | 2531839314 | Propionibacterium acnes | Propionibacterium acnes HL087PA3            |
| 254 clique | 2531839315 | Propionibacterium acnes | Propionibacterium acnes HL110PA4            |
| 254 clique | 2531839316 | Propionibacterium acnes | Propionibacterium acnes HL087PA1            |
| 254 clique | 2531839317 | Propionibacterium acnes | Propionibacterium acnes HL092PA1            |
| 254 clique | 2531839318 | Propionibacterium acnes | Propionibacterium acnes HL083PA1            |
| 254 clique | 2531839319 | Propionibacterium acnes | Propionibacterium acnes HL060PA1            |
| 254 clique | 2531839320 | Propionibacterium acnes | Propionibacterium acnes HL038PA1            |
| 254 clique | 2531839323 | Propionibacterium acnes | Propionibacterium acnes HL083PA2            |
| 254 clique | 2531839324 | Propionibacterium acnes | Propionibacterium acnes HL025PA1            |
| 254 clique | 2531839421 | Propionibacterium acnes | Propionibacterium acnes HL036PA3            |
| 254 clique | 2531839423 | Propionibacterium acnes | Propionibacterium acnes HL030PA2            |
| 254 clique | 2531839424 | Propionibacterium acnes | Propionibacterium acnes HL001PA1            |
| 254 clique | 2531839425 | Propionibacterium acnes | Propionibacterium acnes HL036PA1            |
| 254 clique | 2531839426 | Propionibacterium acnes | Propionibacterium acnes HL036PA2            |
| 254 clique | 2531839427 | Propionibacterium acnes | Propionibacterium acnes HL050PA1            |
| 254 clique | 2531839428 | Propionibacterium acnes | Propionibacterium acnes HL050PA2            |
| 254 clique | 2531839429 | Propionibacterium acnes | Propionibacterium acnes HL050PA3            |
| 254 clique | 2531839430 | Propionibacterium acnes | Propionibacterium acnes HL030PA1            |
| 254 clique | 2531839451 | Propionibacterium acnes | Propionibacterium acnes FZ1/2/0             |
| 254 clique | 2534681798 | Propionibacterium acnes | Propionibacterium acnes HL037PA1            |
| 254 clique | 2534682005 | Propionibacterium acnes | Propionibacterium acnes HL078PA1            |
| 254 clique | 2537561578 | Propionibacterium acnes | Propionibacterium acnes HL110PA3            |
| 254 clique | 2537561579 | Propionibacterium acnes | Propionibacterium acnes HL110PA2            |
| 254 clique | 2537561580 | Propionibacterium acnes | Propionibacterium acnes HL043PA2            |
| 254 clique | 2537561581 | Propionibacterium acnes | Propionibacterium acnes HL043PA1            |
| 254 clique | 2537561582 | Propionibacterium acnes | Propionibacterium acnes HL013PA2            |
| 254 clique | 2537561583 | Propionibacterium acnes | Propionibacterium acnes HL110PA1            |
| 254 clique | 2537561584 | Propionibacterium acnes | Propionibacterium acnes HL074PA1            |
| 254 clique | 2537561585 | Propionibacterium acnes | Propionibacterium acnes HL072PA2            |
| 254 clique | 2537561586 | Propionibacterium acnes | Propionibacterium acnes HL072PA1            |
| 254 clique | 2537561594 | Propionibacterium acnes | Propionibacterium acnes HL099PA1            |
| 254 clique | 2537561595 | Propionibacterium acnes | Propionibacterium acnes HL097PA1            |
| 254 clique | 2537561596 | Propionibacterium acnes | Propionibacterium acnes HL103PA1            |
| 254 clique | 2537561597 | Propionibacterium acnes | Propionibacterium acnes HL096PA3            |
| 254 clique | 2537561598 | Propionibacterium acnes | Propionibacterium acnes HL096PA2            |
| 254 clique | 2537561671 | Propionibacterium acnes | Propionibacterium acnes HL046PA2            |
| 254 clique | 2537561672 | Propionibacterium acnes | Propionibacterium acnes HL046PA1            |
| 254 clique | 2537561673 | Propionibacterium acnes | Propionibacterium acnes HL005PA2            |
| 254 clique | 2537561674 | Propionibacterium acnes | Propionibacterium acnes HL005PA1            |
| 254 clique | 2537561675 | Propionibacterium acnes | Propionibacterium acnes HL059PA1            |
| 254 clique | 2537561676 | Propionibacterium acnes | Propionibacterium acnes HL025PA2            |
| 254 clique | 2537561677 | Propionibacterium acnes | Propionibacterium acnes HL086PA1            |
| 254 clique | 2537561678 | Propionibacterium acnes | Propionibacterium acnes HL059PA2            |
| 254 clique | 2537561681 | Propionibacterium acnes | Propionibacterium acnes HL005PA4            |
| 254 clique | 2537561682 | Propionibacterium acnes | Propionibacterium acnes HL005PA3            |
| 254 clique | 2537561736 | Propionibacterium acnes | Propionibacterium acnes HL082PA1            |
| 254 clique | 2537561743 | Propionibacterium acnes | Propionibacterium acnes HL056PA1            |
| 254 clique | 2537561815 | Propionibacterium acnes | Propionibacterium acnes HL007PA1            |
| 254 clique | 2537561816 | Propionibacterium acnes | Propionibacterium acnes HL002PA3            |
| 254 clique | 2537561817 | Propionibacterium acnes | Propionibacterium acnes HL053PA1            |
| 254 clique | 2537561818 | Propionibacterium acnes | Propionibacterium acnes HL002PA1            |
| 254 clique | 2537561819 | Propionibacterium acnes | Propionibacterium acnes HL063PA1            |
| 254 clique | 2537561820 | Propionibacterium acnes | Propionibacterium acnes HL027PA2            |
| 254 clique | 2537561821 | Propionibacterium acnes | Propionibacterium acnes HL027PA1            |
| 254 clique | 2537561822 | Propionibacterium acnes | Propionibacterium acnes HL067PA1            |
| 254 clique | 2537562124 | Propionibacterium acnes | Propionibacterium acnes SK182               |
| 254 clique | 2540341064 | Propionibacterium acnes | Propionibacterium acnes HL096PA1            |
| 259 clique | 2545824769 | Pasteurella sp.         | Pasteurella multocida RIF                   |
| 259 clique | 2545824770 | Pasteurella sp.         | Pasteurella multocida P1933                 |
| 259 clique | 2545824771 | Pasteurella sp.         | Pasteurella multocida 1500C                 |
| 259 clique | 2545824772 | Pasteurella sp.         | Pasteurella multocida 2000                  |
| 259 clique | 2545824773 | Pasteurella sp.         | Pasteurella multocida 671/90                |
| 259 clique | 637000203  | Pasteurella multocida   | Pasteurella multocida multocida Pm70        |
| 259 clique | 2512047043 | Pasteurella multocida   | Pasteurella multocida 36950                 |
| 259 clique | 2512564074 | Pasteurella multocida   | Pasteurella multocida multocida HN06        |
| 259 clique | 2513237228 | Pasteurella multocida   | Pasteurella multocida multocida P-3480      |
| 259 clique | 2519103085 | Pasteurella multocida   | Pasteurella multocida multocida P52VAC      |
| 259 clique | 2529293056 | Pasteurella multocida   | Pasteurella multocida multocida Anand1_goat |

|            |            |                                   |                                                       |
|------------|------------|-----------------------------------|-------------------------------------------------------|
| 259 clique | 2529293057 | <i>Pasteurella multocida</i>      | <i>Pasteurella multocida</i> gallicida Anand1_poultry |
| 265 clique | 2551306356 | <i>Pseudomonas</i> sp.            | <i>Pseudomonas</i> sp. S5.2                           |
| 265 clique | 650716075  | <i>Pseudomonas mendocina</i>      | <i>Pseudomonas mendocina</i> NK-01                    |
| 272 clique | 2551306543 | <i>Pantoea</i> sp.                | <i>Pantoea</i> sp. B40                                |
| 272 clique | 646564558  | <i>Pantoea ananatis</i>           | <i>Pantoea ananatis</i> LMG 20103                     |
| 272 clique | 651053056  | <i>Pantoea ananatis</i>           | <i>Pantoea ananatis</i> AJ13355                       |
| 272 clique | 2511231160 | <i>Pantoea ananatis</i>           | <i>Pantoea ananatis</i> PA13                          |
| 272 clique | 2511231178 | <i>Pantoea ananatis</i>           | <i>Pantoea ananatis</i> LMG 5342                      |
| 275 clique | 650716007  | <i>Agrobacterium</i> sp.          | <i>Agrobacterium</i> sp. H13-3                        |
| 275 clique | 2521172663 | <i>Agrobacterium</i> sp.          | <i>Agrobacterium</i> sp. 10MFCol1.1                   |
| 275 clique | 2537562123 | <i>Agrobacterium tumefaciens</i>  | <i>Agrobacterium tumefaciens</i> 5A                   |
| 275 clique | 2554235003 | <i>Agrobacterium tumefaciens</i>  | <i>Agrobacterium tumefaciens</i> WRT31                |
| 276 clique | 2554235291 | unclassified                      | <i>Sphingomonas</i> sp. YL-JM2C                       |
| 276 clique | 640427144  | <i>Sphingomonas wittichii</i>     | <i>Sphingomonas wittichii</i> RW1                     |
| 276 clique | 2548876930 | <i>Sphingomonas wittichii</i>     | <i>Sphingomonas wittichii</i> DP58                    |
| 278 clique | 2521172537 | <i>Klebsiella</i> sp.             | <i>Klebsiella</i> sp. BRL6-2                          |
| 278 clique | 2531839402 | <i>Klebsiella oxytoca</i>         | <i>Klebsiella oxytoca</i> 10-5243                     |
| 278 clique | 2531839404 | <i>Klebsiella oxytoca</i>         | <i>Klebsiella oxytoca</i> 10-5245                     |
| 278 clique | 2547132040 | <i>Klebsiella oxytoca</i>         | <i>Klebsiella oxytoca</i> 10-5248                     |
| 278 clique | 2548876782 | <i>Klebsiella oxytoca</i>         | <i>Klebsiella oxytoca</i> 11492-1                     |
| 284 clique | 2551306561 | <i>Aeromonas</i> sp.              | <i>Aeromonas</i> sp. MDS8                             |
| 284 clique | 2529292917 | <i>Aeromonas hydrophila</i>       | <i>Aeromonas hydrophila</i> SSU                       |
| 284 clique | 2551306511 | <i>Aeromonas hydrophila</i>       | <i>Aeromonas hydrophila</i> 277                       |
| 284 clique | 2551306512 | <i>Aeromonas hydrophila</i>       | <i>Aeromonas hydrophila</i> 113                       |
| 284 clique | 2551306513 | <i>Aeromonas hydrophila</i>       | <i>Aeromonas hydrophila</i> 259                       |
| 284 clique | 2551306514 | <i>Aeromonas hydrophila</i>       | <i>Aeromonas hydrophila</i> 187                       |
| 284 clique | 2551306515 | <i>Aeromonas hydrophila</i>       | <i>Aeromonas hydrophila</i> 173                       |
| 284 clique | 2551306648 | <i>Aeromonas hydrophila</i>       | <i>Aeromonas hydrophila</i> 14                        |
| 286 clique | 2554235234 | <i>Klebsiella</i> sp.             | <i>Klebsiella oxytoca</i> SA2                         |
| 286 clique | 2519899599 | <i>Klebsiella oxytoca</i>         | <i>Klebsiella oxytoca</i> M5al                        |
| 292 clique | 643886214  | <i>Acinetobacter</i> sp.          | <i>Acinetobacter</i> sp. ATCC 27244                   |
| 292 clique | 647000202  | <i>Acinetobacter haemolyticus</i> | <i>Acinetobacter haemolyticus</i> ATCC 19194          |
| 292 clique | 2537561554 | <i>Acinetobacter haemolyticus</i> | <i>Acinetobacter haemolyticus</i> CIP 64.3            |
| 292 clique | 2537561834 | <i>Acinetobacter haemolyticus</i> | <i>Acinetobacter haemolyticus</i> NIPH 261            |
| 292 clique | 2545824737 | <i>Acinetobacter haemolyticus</i> | <i>Acinetobacter haemolyticus</i> MTCC 9819           |
| 292 clique | 2551306342 | <i>Acinetobacter haemolyticus</i> | <i>Acinetobacter haemolyticus</i> TG19599             |
| 292 clique | 2551306343 | <i>Acinetobacter haemolyticus</i> | <i>Acinetobacter haemolyticus</i> TG21157             |
| 292 clique | 2551306346 | <i>Acinetobacter haemolyticus</i> | <i>Acinetobacter haemolyticus</i> TG19602             |
| 293 clique | 645058833  | <i>Fusobacterium</i> sp.          | <i>Fusobacterium</i> sp. D11                          |
| 293 clique | 646206252  | <i>Fusobacterium</i> sp.          | <i>Fusobacterium nucleatum</i> animalis 7_1           |
| 293 clique | 647533170  | <i>Fusobacterium</i> sp.          | <i>Fusobacterium</i> sp. 3_1_33                       |
| 293 clique | 651324032  | <i>Fusobacterium</i> sp.          | <i>Fusobacterium</i> sp. 11_3_2                       |
| 293 clique | 651324033  | <i>Fusobacterium</i> sp.          | <i>Fusobacterium</i> sp. 21_1A                        |
| 293 clique | 2554235311 | <i>Fusobacterium</i> sp.          | <i>Fusobacterium</i> sp. 4_8                          |
| 293 clique | 2531839191 | <i>Fusobacterium nucleatum</i>    | <i>Fusobacterium nucleatum</i> polymorphum F0401      |
| 293 clique | 2537561939 | <i>Fusobacterium nucleatum</i>    | <i>Fusobacterium nucleatum</i> animalis F0419         |
| 293 clique | 2554235040 | <i>Fusobacterium nucleatum</i>    | <i>Fusobacterium nucleatum</i> animalis ChDC F324     |
| 298 clique | 2529292817 | <i>Capnocytophaga</i> sp.         | <i>Capnocytophaga</i> sp. oral taxon 380 F0488        |
| 298 clique | 2531839279 | <i>Capnocytophaga</i> sp.         | <i>Capnocytophaga</i> sp. oral taxon 335 F0486        |
| 298 clique | 2531839552 | <i>Capnocytophaga</i> sp.         | <i>Capnocytophaga</i> sp. oral taxon 324 F0483        |
| 298 clique | 2540341000 | <i>Capnocytophaga</i> sp.         | <i>Capnocytophaga</i> sp. oral taxon 412 F0487        |
| 298 clique | 2541047019 | <i>Capnocytophaga</i> sp.         | <i>Capnocytophaga</i> sp. oral taxon 336 F0502        |
| 298 clique | 644736338  | <i>Capnocytophaga ochracea</i>    | <i>Capnocytophaga ochracea</i> VPI 2845, DSM 7271     |
| 298 clique | 649989920  | <i>Capnocytophaga ochracea</i>    | <i>Capnocytophaga ochracea</i> F0287                  |
| 298 clique | 2531839278 | <i>Capnocytophaga ochracea</i>    | <i>Capnocytophaga ochracea</i> Holt 25, ATCC 33596    |
| 301 clique | 2541047255 | <i>Clostridium</i> sp.            | <i>Clostridium difficile</i> CD8                      |
| 301 clique | 2541047256 | <i>Clostridium</i> sp.            | <i>Clostridium difficile</i> CD9                      |
| 301 clique | 2541047257 | <i>Clostridium</i> sp.            | <i>Clostridium difficile</i> CD18                     |
| 301 clique | 2541047259 | <i>Clostridium</i> sp.            | <i>Clostridium difficile</i> CD17                     |
| 301 clique | 2541047260 | <i>Clostridium</i> sp.            | <i>Clostridium difficile</i> CD13                     |
| 301 clique | 2541047263 | <i>Clostridium</i> sp.            | <i>Clostridium difficile</i> CD40                     |
| 301 clique | 2541047265 | <i>Clostridium</i> sp.            | <i>Clostridium difficile</i> CD34                     |
| 301 clique | 2541047269 | <i>Clostridium</i> sp.            | <i>Clostridium difficile</i> CD43                     |
| 301 clique | 2541047270 | <i>Clostridium</i> sp.            | <i>Clostridium difficile</i> CD49                     |
| 301 clique | 2541047271 | <i>Clostridium</i> sp.            | <i>Clostridium difficile</i> CD47                     |
| 301 clique | 2541047272 | <i>Clostridium</i> sp.            | <i>Clostridium difficile</i> CD46                     |
| 301 clique | 2541047273 | <i>Clostridium</i> sp.            | <i>Clostridium difficile</i> CD45                     |
| 301 clique | 2541047274 | <i>Clostridium</i> sp.            | <i>Clostridium difficile</i> CD51                     |
| 301 clique | 2541047278 | <i>Clostridium</i> sp.            | <i>Clostridium difficile</i> CD70                     |
| 301 clique | 2541047281 | <i>Clostridium</i> sp.            | <i>Clostridium difficile</i> CD104                    |
| 301 clique | 2541047282 | <i>Clostridium</i> sp.            | <i>Clostridium difficile</i> CD109                    |
| 301 clique | 2541047283 | <i>Clostridium</i> sp.            | <i>Clostridium difficile</i> CD90                     |
| 301 clique | 2541047284 | <i>Clostridium</i> sp.            | <i>Clostridium difficile</i> CD111                    |
| 301 clique | 2541047286 | <i>Clostridium</i> sp.            | <i>Clostridium difficile</i> CD129                    |
| 301 clique | 2541047288 | <i>Clostridium</i> sp.            | <i>Clostridium difficile</i> CD131                    |
| 301 clique | 2541047289 | <i>Clostridium</i> sp.            | <i>Clostridium difficile</i> CD159                    |
| 301 clique | 2541047291 | <i>Clostridium</i> sp.            | <i>Clostridium difficile</i> CD149                    |
| 301 clique | 2541047292 | <i>Clostridium</i> sp.            | <i>Clostridium difficile</i> CD144                    |
| 301 clique | 2541047296 | <i>Clostridium</i> sp.            | <i>Clostridium difficile</i> CD169                    |
| 301 clique | 2541047300 | <i>Clostridium</i> sp.            | <i>Clostridium difficile</i> CD178                    |
| 301 clique | 2541047301 | <i>Clostridium</i> sp.            | <i>Clostridium difficile</i> CD181                    |
| 301 clique | 2541047302 | <i>Clostridium</i> sp.            | <i>Clostridium difficile</i> CD200                    |
| 301 clique | 2541047303 | <i>Clostridium</i> sp.            | <i>Clostridium difficile</i> CD201                    |
| 301 clique | 2541047307 | <i>Clostridium</i> sp.            | <i>Clostridium difficile</i> 655                      |
| 301 clique | 2541047310 | <i>Clostridium</i> sp.            | <i>Clostridium difficile</i> 842                      |

|            |            |                       |                                             |
|------------|------------|-----------------------|---------------------------------------------|
| 301 clique | 2541047313 | Clostridium sp.       | Clostridium difficile 6057                  |
| 301 clique | 2541047314 | Clostridium sp.       | Clostridium difficile DA00044               |
| 301 clique | 2541047317 | Clostridium sp.       | Clostridium difficile DA00114               |
| 301 clique | 2541047318 | Clostridium sp.       | Clostridium difficile DA00126               |
| 301 clique | 2541047319 | Clostridium sp.       | Clostridium difficile DA00128               |
| 301 clique | 2541047320 | Clostridium sp.       | Clostridium difficile DA00129               |
| 301 clique | 2541047321 | Clostridium sp.       | Clostridium difficile DA00141               |
| 301 clique | 2541047322 | Clostridium sp.       | Clostridium difficile DA00131               |
| 301 clique | 2541047325 | Clostridium sp.       | Clostridium difficile DA00142               |
| 301 clique | 2541047327 | Clostridium sp.       | Clostridium difficile DA00149               |
| 301 clique | 2541047329 | Clostridium sp.       | Clostridium difficile DA00160               |
| 301 clique | 2541047330 | Clostridium sp.       | Clostridium difficile DA00167               |
| 301 clique | 2541047332 | Clostridium sp.       | Clostridium difficile DA00174               |
| 301 clique | 2541047333 | Clostridium sp.       | Clostridium difficile DA00189               |
| 301 clique | 2541047335 | Clostridium sp.       | Clostridium difficile DA00191               |
| 301 clique | 2541047337 | Clostridium sp.       | Clostridium difficile DA00196               |
| 301 clique | 2541047339 | Clostridium sp.       | Clostridium difficile DA00197               |
| 301 clique | 2541047341 | Clostridium sp.       | Clostridium difficile DA00203               |
| 301 clique | 2541047344 | Clostridium sp.       | Clostridium difficile DA00244               |
| 301 clique | 2541047346 | Clostridium sp.       | Clostridium difficile DA00232               |
| 301 clique | 2541047347 | Clostridium sp.       | Clostridium difficile DA00216               |
| 301 clique | 2541047348 | Clostridium sp.       | Clostridium difficile DA00215               |
| 301 clique | 2541047349 | Clostridium sp.       | Clostridium difficile DA00245               |
| 301 clique | 2541047352 | Clostridium sp.       | Clostridium difficile DA00275               |
| 301 clique | 2541047354 | Clostridium sp.       | Clostridium difficile DA00273               |
| 301 clique | 2541047356 | Clostridium sp.       | Clostridium difficile DA00313               |
| 301 clique | 2541047358 | Clostridium sp.       | Clostridium difficile DA00310               |
| 301 clique | 2541047360 | Clostridium sp.       | Clostridium difficile DA00306               |
| 301 clique | 2541047361 | Clostridium sp.       | Clostridium difficile F253                  |
| 301 clique | 2541047362 | Clostridium sp.       | Clostridium difficile F249                  |
| 301 clique | 2541047365 | Clostridium sp.       | Clostridium difficile Y10                   |
| 301 clique | 2541047369 | Clostridium sp.       | Clostridium difficile Y41                   |
| 301 clique | 2541047373 | Clostridium sp.       | Clostridium difficile Y215                  |
| 301 clique | 2541047374 | Clostridium sp.       | Clostridium difficile Y231                  |
| 301 clique | 2541047375 | Clostridium sp.       | Clostridium difficile Y312                  |
| 301 clique | 2541047377 | Clostridium sp.       | Clostridium difficile Y307                  |
| 301 clique | 2541047378 | Clostridium sp.       | Clostridium difficile Y247                  |
| 301 clique | 2541047382 | Clostridium sp.       | Clostridium difficile Y381                  |
| 301 clique | 2541047384 | Clostridium sp.       | Clostridium difficile Y401                  |
| 301 clique | 2541047386 | Clostridium sp.       | Clostridium difficile P5                    |
| 301 clique | 2541047388 | Clostridium sp.       | Clostridium difficile P7                    |
| 301 clique | 2541047392 | Clostridium sp.       | Clostridium difficile P19                   |
| 301 clique | 2541047393 | Clostridium sp.       | Clostridium difficile P21                   |
| 301 clique | 2541047396 | Clostridium sp.       | Clostridium difficile P25                   |
| 301 clique | 2541047397 | Clostridium sp.       | Clostridium difficile P20                   |
| 301 clique | 2541047400 | Clostridium sp.       | Clostridium difficile P30                   |
| 301 clique | 2541047405 | Clostridium sp.       | Clostridium difficile P42                   |
| 301 clique | 2541047406 | Clostridium sp.       | Clostridium difficile P45                   |
| 301 clique | 2541047409 | Clostridium sp.       | Clostridium difficile P49                   |
| 301 clique | 2541047413 | Clostridium sp.       | Clostridium difficile P59                   |
| 301 clique | 2541047415 | Clostridium sp.       | Clostridium difficile P72                   |
| 301 clique | 2541047416 | Clostridium sp.       | Clostridium difficile P70                   |
| 301 clique | 2541047417 | Clostridium sp.       | Clostridium difficile P69                   |
| 301 clique | 2541047419 | Clostridium sp.       | Clostridium difficile P74                   |
| 301 clique | 2541047420 | Clostridium sp.       | Clostridium difficile P75                   |
| 301 clique | 2541047488 | Clostridium sp.       | Clostridium difficile CD196                 |
| 301 clique | 2541047496 | Clostridium sp.       | Clostridium difficile P11                   |
| 301 clique | 2541047511 | Clostridium sp.       | Clostridium difficile F548                  |
| 301 clique | 2541047514 | Clostridium sp.       | Clostridium difficile F200                  |
| 301 clique | 638341066  | Clostridium difficile | Clostridium difficile QCD-32g58             |
| 301 clique | 640069308  | Clostridium difficile | Clostridium difficile 630 (epidemic type X) |
| 301 clique | 641736216  | Clostridium difficile | Clostridium difficile QCD-76w55, NAP1       |
| 301 clique | 641736217  | Clostridium difficile | Clostridium difficile QCD-63q42             |
| 301 clique | 641736218  | Clostridium difficile | Clostridium difficile QCD-37x79, NAP1a/001  |
| 301 clique | 641736219  | Clostridium difficile | Clostridium difficile QCD-97b34, NAP1b/006  |
| 301 clique | 642791606  | Clostridium difficile | Clostridium difficile CIP 107932            |
| 301 clique | 642791631  | Clostridium difficile | Clostridium difficile QCD-23m63             |
| 301 clique | 645058803  | Clostridium difficile | Clostridium difficile QCD-66c26             |
| 301 clique | 646311914  | Clostridium difficile | Clostridium difficile CD196                 |
| 301 clique | 646311915  | Clostridium difficile | Clostridium difficile R20291                |
| 301 clique | 647000226  | Clostridium difficile | Clostridium difficile B19                   |
| 301 clique | 647000227  | Clostridium difficile | Clostridium difficile NAP07                 |
| 301 clique | 647000228  | Clostridium difficile | Clostridium difficile NAP08                 |
| 301 clique | 2512047057 | Clostridium difficile | Clostridium difficile VPI 10463, ATCC 43255 |
| 301 clique | 2515154168 | Clostridium difficile | Clostridium difficile ATCC 9689             |
| 301 clique | 2526164710 | Clostridium difficile | Clostridium difficile DSM 1296              |
| 301 clique | 2534681960 | Clostridium difficile | Clostridium difficile 002-P50-2011          |
| 301 clique | 2534681961 | Clostridium difficile | Clostridium difficile 050-P50-2011          |
| 301 clique | 2537561695 | Clostridium difficile | Clostridium difficile 70-100-2010           |
| 301 clique | 2541047254 | Clostridium difficile | Clostridium difficile CD3                   |
| 301 clique | 2541047258 | Clostridium difficile | Clostridium difficile CD21                  |
| 301 clique | 2541047261 | Clostridium difficile | Clostridium difficile CD22                  |
| 301 clique | 2541047262 | Clostridium difficile | Clostridium difficile CD39                  |
| 301 clique | 2541047264 | Clostridium difficile | Clostridium difficile CD38                  |
| 301 clique | 2541047266 | Clostridium difficile | Clostridium difficile CD44                  |



|            |            |                                      |                                                      |
|------------|------------|--------------------------------------|------------------------------------------------------|
| 311 clique | 645058782  | Bacteroides sp.                      | Bacteroides sp. 2_1_7                                |
| 311 clique | 647533112  | Bacteroides sp.                      | Bacteroides sp. 2_1_33B                              |
| 311 clique | 648861001  | Bacteroides sp.                      | Bacteroides sp. 20_3                                 |
| 311 clique | 648861002  | Bacteroides sp.                      | Bacteroides sp. 3_1_19                               |
| 311 clique | 646206279  | Parabacteroides sp.                  | Parabacteroides sp. D13                              |
| 311 clique | 640753039  | Parabacteroides distasonis           | Parabacteroides distasonis ATCC 8503                 |
| 311 clique | 2534682208 | Parabacteroides distasonis           | Parabacteroides distasonis CL09T03C24                |
| 311 clique | 2534682209 | Parabacteroides distasonis           | Parabacteroides distasonis CL03T12C09                |
| 312 clique | 2504756062 | Paenibacillus sp.                    | Paenibacillus sp. J6                                 |
| 312 clique | 2505679063 | Paenibacillus sp.                    | Paenibacillus sp. J10                                |
| 312 clique | 2508501032 | Paenibacillus sp.                    | Paenibacillus sp. J14                                |
| 312 clique | 2528768218 | Paenibacillus sp.                    | Paenibacillus sp. J14                                |
| 312 clique | 2528768219 | Paenibacillus sp.                    | Paenibacillus sp. J6                                 |
| 312 clique | 2505679060 | Paenibacillus barengoltzii           | Paenibacillus barengoltzii J12                       |
| 312 clique | 2528768208 | Paenibacillus barengoltzii           | Paenibacillus barengoltzii J12                       |
| 313 clique | 645951866  | Fusobacterium sp.                    | Fusobacterium sp. 3_1_5R                             |
| 313 clique | 645951804  | Fusobacterium gonidiaformans         | Fusobacterium gonidiaformans ATCC 25563              |
| 316 clique | 646311966  | Vibrio sp.                           | Vibrio sp. Ex25                                      |
| 316 clique | 254555817  | Vibrio sp.                           | Vibrio sp. Ex25                                      |
| 316 clique | 2534682140 | Vibrio alginolyticus                 | Vibrio alginolyticus E0666                           |
| 324 clique | 2522572104 | Burkholderia sp.                     | Burkholderia sp. URHA0054                            |
| 324 clique | 641736151  | Burkholderia graminis                | Burkholderia graminis C4D1M                          |
| 340 clique | 2512047052 | Actinomyces sp.                      | Actinomyces sp. F0384                                |
| 340 clique | 649989905  | Actinomyces viscosus                 | Actinomyces viscosus C505                            |
| 342 clique | 2516493017 | Desulfotobacterium sp.               | Desulfotobacterium sp. LBE                           |
| 342 clique | 637000093  | Desulfotobacterium hafniense         | Desulfotobacterium hafniense Y51                     |
| 342 clique | 643348537  | Desulfotobacterium hafniense         | Desulfotobacterium hafniense DCB-2                   |
| 342 clique | 2513020008 | Desulfotobacterium hafniense         | Desulfotobacterium hafniense TCE-1                   |
| 342 clique | 2513237149 | Desulfotobacterium hafniense         | Desulfotobacterium hafniense PCP-1                   |
| 342 clique | 2516653041 | Desulfotobacterium hafniense         | Desulfotobacterium hafniense TCP-A                   |
| 342 clique | 2522572064 | Desulfotobacterium hafniense         | Desulfotobacterium hafniense DP7 (draft 151 contigs) |
| 350 clique | 646206263  | Bacteroides sp.                      | Bacteroides sp. 9_1_42FAA                            |
| 350 clique | 647533113  | Bacteroides sp.                      | Bacteroides sp. 3_1_33FAA                            |
| 350 clique | 642979370  | Bacteroides dorei                    | Bacteroides dorei DSM 17855                          |
| 350 clique | 646206258  | Bacteroides dorei                    | Bacteroides dorei 5_1_36/D4                          |
| 350 clique | 2531839307 | Bacteroides dorei                    | Bacteroides dorei CL02T12C06                         |
| 350 clique | 2531839308 | Bacteroides dorei                    | Bacteroides dorei CL03T12C01                         |
| 350 clique | 2537562062 | Bacteroides dorei                    | Bacteroides dorei CL02T00C15                         |
| 351 clique | 2551306537 | Enterobacter sp.                     | Enterobacter sp. B509                                |
| 351 clique | 2547132296 | Enterobacter mori                    | Enterobacter mori LMG 25706                          |
| 361 clique | 2516653053 | Deinococcus sp.                      | Deinococcus sp. 2009                                 |
| 361 clique | 2524614857 | Deinococcus ficus                    | Deinococcus ficus DSM 19119                          |
| 370 clique | 2526164723 | Pectobacterium sp.                   | Pectobacterium sp. SCC3193                           |
| 370 clique | 646311947  | Pectobacterium wasabiae              | Pectobacterium wasabiae WPP163                       |
| 380 clique | 2537561632 | Capnocytophaga sp.                   | Capnocytophaga sp. CM59                              |
| 380 clique | 2541046980 | Capnocytophaga granulosa             | Capnocytophaga granulosa ATCC 51502                  |
| 384 clique | 2513237088 | Rhizobium sp.                        | Rhizobium sp. STM6155                                |
| 384 clique | 2534682333 | Rhizobium mesoamericanum             | Rhizobium mesoamericanum STM3625                     |
| 400 clique | 649633069  | unclassified                         | Micromonospora sp. L5                                |
| 400 clique | 2501939600 | unclassified                         | Micromonospora L5                                    |
| 400 clique | 648028042  | Micromonospora aurantiaca            | Micromonospora aurantiaca ATCC 27029                 |
| 410 clique | 2546826724 | Methylobacterium sp.                 | Methylobacterium sp. EUR3 AL-11                      |
| 410 clique | 2547132193 | Methylobacterium sp.                 | Methylobacterium sp. L2-4                            |
| 410 clique | 641522638  | Methylobacterium radiotolerans       | Methylobacterium radiotolerans JCM 2831              |
| 411 clique | 639633059  | Shewanella sp.                       | Shewanella sp. W3-18-1                               |
| 411 clique | 2510436004 | Shewanella putrefaciens              | Shewanella putrefaciens 200 (Missing data)           |
| 411 clique | 2524023073 | Shewanella putrefaciens              | Shewanella putrefaciens CN-32                        |
| 419 clique | 2505679059 | Ochrobactrum sp.                     | Ochrobactrum sp. J50                                 |
| 419 clique | 2504756061 | Ochrobactrum intermedium             | Ochrobactrum intermedium J2                          |
| 431 clique | 2516653074 | Burkholderia sp.                     | Burkholderia sp. WSM4176                             |
| 431 clique | 2501025500 | Burkholderia tuberum                 | Burkholderia tuberum STM678                          |
| 436 clique | 2551306696 | Caldicellulosiruptor sp.             | Caldicellulosiruptor sp. F32                         |
| 436 clique | 640427106  | Caldicellulosiruptor saccharolyticus | Caldicellulosiruptor saccharolyticus DSM 8903        |
| 444 clique | 648276706  | Oscillatoria sp.                     | Oscillatoria sp. PCC 6506                            |
| 444 clique | 2508501075 | Oscillatoria formosa                 | Oscillatoria formosa PCC 6407                        |
| 452 clique | 2541047099 | Pseudomonas sp.                      | Pseudomonas sp. CF150                                |
| 452 clique | 2541047103 | Pseudomonas sp.                      | Pseudomonas sp. CFT9                                 |
| 452 clique | 2521172707 | Pseudomonas fluorescens              | Pseudomonas fluorescens A506                         |
| 455 clique | 2508501008 | unclassified                         | Azospira sp. ZAP                                     |
| 455 clique | 2508501046 | Azospira suillum                     | Azospira suillum PS                                  |
| 462 clique | 2505679024 | Fischerella sp.                      | Fischerella sp. JSC-11                               |
| 462 clique | 2548876998 | Fischerella thermalis                | Fischerella thermalis PCC 7521                       |
| 480 clique | 2529293097 | Pelosinus fermentans                 | Pelosinus fermentans A11                             |
| 480 clique | 2529293098 | Pelosinus fermentans                 | Pelosinus fermentans A12                             |
| 480 clique | 2529293099 | Pelosinus fermentans                 | Pelosinus fermentans R7, DSM 17108                   |
| 480 clique | 2534682259 | Pelosinus fermentans                 | Pelosinus fermentans B3                              |
| 480 clique | 2537561517 | Pelosinus fermentans                 | Pelosinus fermentans B4                              |
| 480 clique | 2511231046 | Pelosinus sp.                        | Pelosinus sp. HCF1                                   |
| 481 clique | 2503198003 | Clostridium sp.                      | Clostridium sp. CP1                                  |
| 481 clique | 2531839097 | Clostridium pasteurianum             | Clostridium pasteurianum DSM 525                     |
| 482 clique | 651285008  | Streptococcus sp.                    | Streptococcus sp. C150                               |
| 482 clique | 2516143101 | Streptococcus salivarius             | Streptococcus salivarius PS4                         |
| 484 clique | 2537561772 | Campylobacter sp.                    | Campylobacter sp. FOBR14                             |
| 484 clique | 640753010  | Campylobacter curvus                 | Campylobacter curvus 525.92                          |
| 489 clique | 2541047041 | unclassified                         | Leptospira sp. sv. Kenya Sh9                         |

|            |            |                                  |                                                     |
|------------|------------|----------------------------------|-----------------------------------------------------|
| 489 clique | 639633032  | Leptospira borgpetersenii        | Leptospira borgpetersenii sv Hardjo-ovis JB197      |
| 489 clique | 639633033  | Leptospira borgpetersenii        | Leptospira borgpetersenii sv Hardjo-ovis L550       |
| 489 clique | 2519103083 | Leptospira borgpetersenii        | Leptospira borgpetersenii sv. Castellonis 200801910 |
| 489 clique | 2519103130 | Leptospira borgpetersenii        | Leptospira borgpetersenii UI 09149                  |
| 489 clique | 2526164610 | Leptospira borgpetersenii        | Leptospira borgpetersenii sv. Mini 201000851        |
| 489 clique | 2526164642 | Leptospira borgpetersenii        | Leptospira borgpetersenii sv. Javanica MK146        |
| 489 clique | 2526164643 | Leptospira borgpetersenii        | Leptospira borgpetersenii Brem 328                  |
| 489 clique | 2526164644 | Leptospira borgpetersenii        | Leptospira borgpetersenii Brem 307                  |
| 489 clique | 2528311142 | Leptospira borgpetersenii        | Leptospira borgpetersenii sv. Javanica UI 09931     |
| 489 clique | 2537561563 | Leptospira borgpetersenii        | Leptospira borgpetersenii Noumea 25                 |
| 489 clique | 2537561607 | Leptospira borgpetersenii        | Leptospira borgpetersenii 200801926                 |
| 489 clique | 2541047033 | Leptospira borgpetersenii        | Leptospira borgpetersenii sv. Hardjo-ovis Sponselee |
| 489 clique | 2548876766 | Leptospira borgpetersenii        | Leptospira borgpetersenii sv. Kenya TE 0159         |
| 489 clique | 2548876767 | Leptospira borgpetersenii        | Leptospira borgpetersenii sv. Javanica L0864        |
| 489 clique | 2551306643 | Leptospira borgpetersenii        | Leptospira borgpetersenii sv. Hardjo-ovis Lely 607  |
| 489 clique | 2551306644 | Leptospira borgpetersenii        | Leptospira borgpetersenii sv. Javanica L0066        |
| 492 clique | 2512047080 | Vibrio sp.                       | Vibrio sp. N418                                     |
| 492 clique | 2512047079 | Vibrio scophthalmi               | Vibrio scophthalmi LMG 19158                        |
| 495 clique | 648276708  | Pantoea sp.                      | Pantoea sp. aB                                      |
| 495 clique | 2541047590 | Pantoea agglomerans              | Pantoea agglomerans 299R                            |
| 513 clique | 648861006  | unclassified                     | Burkholderiales bacterium 1_1_47                    |
| 513 clique | 651324084  | Parasutterella excrementihominis | Parasutterella excrementihominis YIT 11859          |
| 531 clique | 2541047040 | unclassified                     | Leptospira sp. P2653                                |
| 531 clique | 2526164577 | Leptospira weilii                | Leptospira weilii 2006001855                        |
| 531 clique | 2534682340 | Leptospira weilii                | Leptospira weilii UI 13098                          |
| 531 clique | 2534682341 | Leptospira weilii                | Leptospira weilii LNT 1234                          |
| 531 clique | 2534682342 | Leptospira weilii                | Leptospira weilii Ecochallenge                      |
| 531 clique | 2548876967 | Leptospira weilii                | Leptospira weilii LNT 1194                          |
| 531 clique | 2548876968 | Leptospira weilii                | Leptospira weilii UI 14631                          |
| 541 clique | 2513237394 | Neisseria sp.                    | Neisseria sp. GT4A_CT1                              |
| 541 clique | 651324075  | Neisseria macacae                | Neisseria macacae ATCC 33926                        |
| 552 clique | 651324015  | unclassified                     | Bradyrhizobiaceae bacterium SG-6C                   |
| 552 clique | 2537561906 | Afiplia clevelandensis           | Afiplia clevelandensis ATCC 49720                   |
| 559 clique | 2513237395 | Lactobacillus sp.                | Lactobacillus sp. 7_1_47FAA                         |
| 559 clique | 645951832  | Lactobacillus iners              | Lactobacillus iners DSM 13335                       |
| 559 clique | 648276682  | Lactobacillus iners              | Lactobacillus iners AB-1                            |
| 559 clique | 649989959  | Lactobacillus iners              | Lactobacillus iners ATCC 55195                      |
| 559 clique | 649989960  | Lactobacillus iners              | Lactobacillus iners LEAF 2052A-d                    |
| 559 clique | 649989961  | Lactobacillus iners              | Lactobacillus iners LEAF 2053A-b                    |
| 559 clique | 649989962  | Lactobacillus iners              | Lactobacillus iners LEAF 2062A-h1                   |
| 559 clique | 649989963  | Lactobacillus iners              | Lactobacillus iners LEAF 3008A-a                    |
| 559 clique | 649989965  | Lactobacillus iners              | Lactobacillus iners LactinV 03V1-b                  |
| 559 clique | 649989966  | Lactobacillus iners              | Lactobacillus iners LactinV 09V1-c                  |
| 559 clique | 649989967  | Lactobacillus iners              | Lactobacillus iners LactinV 11V1-d                  |
| 559 clique | 649989968  | Lactobacillus iners              | Lactobacillus iners SPIN 2503V10-D                  |
| 559 clique | 651324062  | Lactobacillus iners              | Lactobacillus iners SPIN 1401G                      |
| 559 clique | 651324063  | Lactobacillus iners              | Lactobacillus iners UP11 143-D                      |
| 559 clique | 651324064  | Lactobacillus iners              | Lactobacillus iners UP11 60-B                       |
| 577 clique | 2519899622 | Pseudomonas sp.                  | Pseudomonas sp. Ag1                                 |
| 577 clique | 2531839262 | Pseudomonas fluorescens          | Pseudomonas fluorescens BBc6R8                      |
| 590 clique | 2540341169 | Serratia sp.                     | Serratia sp. WW4                                    |
| 590 clique | 2554235221 | Serratia sp.                     | Serratia marcescens LCT-SM166                       |
| 590 clique | 2554235222 | Serratia sp.                     | Serratia marcescens LCT-SM262                       |
| 590 clique | 2529293103 | Serratia marcescens              | Serratia marcescens VGH107                          |
| 590 clique | 2548876920 | Serratia marcescens              | Serratia marcescens LCT-SM213                       |
| 595 clique | 2502171177 | Arcobacter sp.                   | Arcobacter sp. 1                                    |
| 595 clique | 640753004  | Arcobacter butzleri              | Arcobacter butzleri RM4018                          |
| 595 clique | 649989908  | Arcobacter butzleri              | Arcobacter butzleri JV22                            |
| 595 clique | 2511231182 | Arcobacter butzleri              | Arcobacter butzleri ED-1                            |
| 595 clique | 2541046991 | Arcobacter butzleri              | Arcobacter butzleri 7h1h                            |
| 600 clique | 2513237383 | Fusobacterium sp.                | Fusobacterium sp. 12_1B                             |
| 600 clique | 645951859  | Fusobacterium ulcerans           | Fusobacterium ulcerans ATCC 49185                   |
| 608 clique | 2554235440 | Mannheimia sp.                   | Mannheimia haemolytica USMARC_2286                  |
| 608 clique | 647000269  | Mannheimia haemolytica           | Mannheimia haemolytica A2 BOVINE                    |
| 608 clique | 647000270  | Mannheimia haemolytica           | Mannheimia haemolytica A2 OVINE                     |
| 608 clique | 647533181  | Mannheimia haemolytica           | Mannheimia haemolytica PHL213                       |
| 608 clique | 2523533563 | Mannheimia haemolytica           | Mannheimia haemolytica                              |
| 608 clique | 2537561899 | Mannheimia haemolytica           | Mannheimia haemolytica 6 H23                        |
| 608 clique | 2545824631 | Mannheimia haemolytica           | Mannheimia haemolytica USDA-ARS-USMARC-185          |
| 608 clique | 2545824632 | Mannheimia haemolytica           | Mannheimia haemolytica USDA-ARS-USMARC-183          |
| 608 clique | 2554235380 | Mannheimia haemolytica           | Mannheimia haemolytica D153                         |
| 608 clique | 2554235406 | Mannheimia haemolytica           | Mannheimia haemolytica D174                         |
| 608 clique | 2554235407 | Mannheimia haemolytica           | Mannheimia haemolytica D171                         |
| 614 clique | 647533114  | Bacteroides sp.                  | Bacteroides sp. D20                                 |
| 614 clique | 649989914  | Bacteroides sp.                  | Bacteroides sp. 4_1_36                              |
| 614 clique | 641380447  | Bacteroides uniformis            | Bacteroides uniformis ATCC 8492                     |
| 614 clique | 2534681854 | Bacteroides uniformis            | Bacteroides uniformis CL03T12C37                    |
| 614 clique | 2537561752 | Bacteroides uniformis            | Bacteroides uniformis CL03T00C23                    |
| 616 clique | 2501846304 | Xanthomonas sp.                  | Xanthomonas sp. 7                                   |
| 616 clique | 651324109  | Xanthomonas perforans            | Xanthomonas gardneri PDDCC 1620, ATCC 19865         |
| 617 clique | 2523231035 | Gordonia sp.                     | Gordonia sp. KTR9                                   |
| 617 clique | 2545824722 | Gordonia terrae                  | Gordonia terrae C-6                                 |
| 620 clique | 650377931  | Erwinia sp.                      | Erwinia sp. Ejp617                                  |
| 620 clique | 646564532  | Erwinia pyrifoliae               | Erwinia pyrifoliae Ep1/96                           |
| 620 clique | 646862321  | Erwinia pyrifoliae               | Erwinia pyrifoliae DSM 12163                        |



|            |                                                  |                                                                         |
|------------|--------------------------------------------------|-------------------------------------------------------------------------|
| 629 clique | 649989907 Anaerostipes sp.                       | Anaerostipes sp. 3_2_56FAA                                              |
| 629 clique | 641736227 Anaerostipes caccae                    | Anaerostipes caccae DSM 14662                                           |
| 633 clique | 2517572184 Streptomyces sp.                      | Streptomyces sp. CNY228                                                 |
| 633 clique | 2526164526 Streptomyces sp.                      | Streptomyces sp. LaPpAH-201                                             |
| 633 clique | 2547132081 Streptomyces sp.                      | Streptomyces sp. S4                                                     |
| 633 clique | 645058823 Streptomyces albus                     | Streptomyces albus J1074                                                |
| 633 clique | 2541047081 Streptomyces albus                    | Streptomyces albus J1074                                                |
| 634 clique | 651324107 Turicibacter sp.                       | Turicibacter sp. HGF1                                                   |
| 634 clique | 647000330 Turicibacter sanguinis                 | Turicibacter sanguinis PC909                                            |
| 640 clique | 2531839311 Acinetobacter sp.                     | Acinetobacter sp. HA                                                    |
| 640 clique | 2551306381 Acinetobacter schindleri              | Acinetobacter schindleri TG19614                                        |
| 642 clique | 2519899605 Staphylococcus sp.                    | Staphylococcus sp. OJ82                                                 |
| 642 clique | 2529293016 Staphylococcus equorum                | Staphylococcus equorum equorum Mu2                                      |
| 644 clique | 2508501006 Pseudomonas sp.                       | Pseudomonas sp. PK                                                      |
| 644 clique | 2518645567 Pseudomonas stutzeri                  | Pseudomonas stutzeri AN10, CCUG 29243                                   |
| 648 clique | 2531839264 Rhodococcus sp.                       | Rhodococcus sp. JVH1                                                    |
| 648 clique | 2548877052 Rhodococcus sp.                       | Rhodococcus sp. DK17                                                    |
| 648 clique | 637000234 Rhodococcus jostii                     | Rhodococcus jostii RHA1                                                 |
| 654 clique | 2527291525 unclassified                          | Cloacimonetes bacterium JGI 0000039-G13 (Combined_Assembly_WWE1_1_WWE1) |
| 654 clique | 642555115 Candidatus Cloacamonas acidaminovorans | Candidatus Cloacamonas acidaminovorans                                  |
| 674 clique | 2519899510 Methylobacterium sp.                  | Methylobacterium sp. 73s                                                |
| 674 clique | 2516493010 Methylobacterium versatilis           | Methylobacterium versatilis 79                                          |
| 677 clique | 2537561631 Streptococcus sp.                     | Streptococcus sp. BS35b                                                 |
| 677 clique | 2537561966 Streptococcus oralis                  | Streptococcus oralis SK1074                                             |
| 683 clique | 643886005 Clostridium sp.                        | Clostridium sp. M62/1                                                   |
| 683 clique | 650377923 Clostridium cf. saccharolyticum        | Clostridium cf. saccharolyticum K10                                     |
| 691 clique | 639857033 Pseudoalteromonas sp.                  | Pseudoalteromonas sp. TW-7                                              |
| 691 clique | 2540341038 Pseudoalteromonas sp.                 | Pseudoalteromonas sp. BSI20480                                          |
| 691 clique | 2541047158 Pseudoalteromonas marina              | Pseudoalteromonas marina mano4                                          |
| 692 clique | 2531839499 Anoxybacillus sp.                     | Anoxybacillus sp. DT3-1                                                 |
| 692 clique | 2551306365 Geobacillus caldioxysilyticus         | Geobacillus caldioxysilyticus G10                                       |
| 699 clique | 2519899670 Nocardioopsis sp.                     | Nocardioopsis sp. CNS639                                                |
| 699 clique | 646564557 Nocardioopsis dassonvillei             | Nocardioopsis dassonvillei dassonvillei DSM 43111                       |
| 701 clique | 2534682194 Burkholderia sp.                      | Burkholderia sp. BT03                                                   |
| 701 clique | 2537561811 Burkholderia terrae                   | Burkholderia terrae BS001                                               |
| 702 clique | 2512875014 Desulfobacterium sp.                  | Desulfobacterium sp. PCE1, DSM 10344                                    |
| 702 clique | 2507262031 Desulfobacterium dehalogenans         | Desulfobacterium dehalogenans JW/IU-DC1, ATCC 51507                     |
| 709 clique | 650716032 Delftia sp.                            | Delftia sp. Cs1-4                                                       |
| 709 clique | 641228489 Delftia acidovorans                    | Delftia acidovorans SPH-1                                               |
| 712 clique | 2551306544 Mycobacterium sp.                     | Mycobacterium sp. VKM Ac-1817D                                          |
| 712 clique | 2519899744 Mycobacterium fortuitum               | Mycobacterium fortuitum fortuitum DSM 46621                             |
| 720 clique | 2551306111 Pseudoalteromonas sp.                 | Pseudoalteromonas sp. NJ631                                             |
| 720 clique | 2519899641 Pseudoalteromonas piscicida           | Pseudoalteromonas piscicida ATCC 15057                                  |
| 720 clique | 2541047159 Pseudoalteromonas piscicida           | Pseudoalteromonas piscicida JCM 20779                                   |
| 724 clique | 646206256 Citrobacter sp.                        | Citrobacter sp. 30_2                                                    |
| 724 clique | 2513237266 Citrobacter freundii                  | Citrobacter freundii 4_7_47CFAA                                         |
| 734 clique | 2510917027 Brevibacillus sp.                     | Brevibacillus sp. CF112                                                 |
| 734 clique | 2524023183 Brevibacillus agri                    | Brevibacillus agri BAB-2500                                             |
| 735 clique | 642555106 Anaeromyxobacter sp.                   | Anaeromyxobacter sp. K                                                  |
| 735 clique | 643348507 Anaeromyxobacter dehalogenans          | Anaeromyxobacter dehalogenans 2CP-1                                     |
| 738 clique | 641522631 Halobacterium salinarum                | Halobacterium salinarum R1, DSM 671                                     |
| 738 clique | 638154504 Halobacterium sp.                      | Halobacterium sp. NRC-1                                                 |
| 739 clique | 2540341240 Microbacterium sp.                    | Microbacterium sp. KROCY2                                               |
| 739 clique | 2519899570 Kocuria palustris                     | Kocuria palustris TAGA27                                                |
| 745 clique | 650716094 Tepidanaerobacter sp.                  | Tepidanaerobacter sp. Re1                                               |
| 745 clique | 2540341113 Tepidanaerobacter acetatoxydans       | Tepidanaerobacter acetatoxydans Re1                                     |
| 751 clique | 2537562058 Acinetobacter sp.                     | Acinetobacter sp. WC-743                                                |
| 751 clique | 2547132297 Acinetobacter berezeniae              | Acinetobacter berezeniae Brouou 64, LMG 1003                            |
| 762 clique | 646206274 Bacteroides sp.                        | Bacteroides sp. 4_3_47FAA                                               |
| 762 clique | 649989913 Bacteroides sp.                        | Bacteroides sp. 3_1_40A                                                 |
| 762 clique | 640753008 Bacteroides vulgatus                   | Bacteroides vulgatus ATCC 8482                                          |
| 762 clique | 647000214 Bacteroides vulgatus                   | Bacteroides vulgatus PC510                                              |
| 762 clique | 2503754051 Bacteroides vulgatus                  | Bacteroides vulgatus 274-1D4 (mouse strain)                             |
| 762 clique | 2510065017 Bacteroides vulgatus                  | Bacteroides vulgatus RJ2H1                                              |
| 762 clique | 2510065018 Bacteroides vulgatus                  | Bacteroides vulgatus RJ2L3                                              |
| 762 clique | 2537561756 Bacteroides vulgatus                  | Bacteroides vulgatus CL09T03C04                                         |
| 774 clique | 2519899750 Rhodobacter sp.                       | Rhodobacter sp. AKP1                                                    |
| 774 clique | 640069327 Rhodobacter sphaeroides                | Rhodobacter sphaeroides 2.4.1, ATCC BAA-808                             |
| 774 clique | 640069328 Rhodobacter sphaeroides                | Rhodobacter sphaeroides ATCC 17029                                      |
| 774 clique | 643348570 Rhodobacter sphaeroides                | Rhodobacter sphaeroides KD131                                           |
| 774 clique | 651324095 Rhodobacter sphaeroides                | Rhodobacter sphaeroides WSNB                                            |
| 774 clique | 2512875023 Rhodobacter sphaeroides               | Rhodobacter sphaeroides 2.4.1                                           |
| 775 clique | 2519103095 Burkholderia sp.                      | Burkholderia sp. KJ006                                                  |
| 775 clique | 640069307 Burkholderia vietnamiensis             | Burkholderia vietnamiensis G4                                           |
| 782 clique | 2528768092 Ralstonia sp.                         | Ralstonia sp. JGI 0001001-B07 (contamination screened)                  |
| 782 clique | 2528768093 Ralstonia sp.                         | Ralstonia sp. JGI 0001001-C06 (contamination screened)                  |
| 782 clique | 2528768035 unclassified                          | beta proteobacterium JGI 0001001-A11 (contamination screened)           |
| 782 clique | 642555151 Ralstonia pickettii                    | Ralstonia pickettii 12J                                                 |
| 782 clique | 2522125080 Ralstonia pickettii                   | Ralstonia pickettii OR214                                               |
| 783 clique | 2507149004 Alcanivorax sp.                       | Alcanivorax sp.                                                         |
| 783 clique | 2507149008 Alcanivorax sp.                       | Alcanivorax sp. sk2-jrc                                                 |
| 783 clique | 637000004 Alcanivorax borkumensis                | Alcanivorax borkumensis SK2                                             |
| 784 clique | 2518645600 Pseudomonas sp.                       | Pseudomonas sp. URMO17WK12:11                                           |
| 784 clique | 2523533528 Pseudomonas sp.                       | Pseudomonas sp. URMO17WK12:14                                           |
| 784 clique | 2523533568 Pseudomonas sp.                       | Pseudomonas sp. URMO17WK12:13                                           |

|            |            |                                        |                                                                                        |
|------------|------------|----------------------------------------|----------------------------------------------------------------------------------------|
| 784 clique | 2505679082 | <i>Pseudomonas fulva</i>               | <i>Pseudomonas fulva</i> 12-X                                                          |
| 786 clique | 2531839272 | <i>Prevotella sp.</i>                  | <i>Prevotella sp.</i> MSX73                                                            |
| 786 clique | 647533195  | <i>Prevotella buccae</i>               | <i>Prevotella buccae</i> D17                                                           |
| 786 clique | 64989986   | <i>Prevotella buccae</i>               | <i>Prevotella buccae</i> ATCC 33574                                                    |
| 802 clique | 2517093029 | <i>Natrinema sp.</i>                   | <i>Natrinema sp.</i> J7-2                                                              |
| 802 clique | 2554235484 | <i>Natrinema gari</i>                  | <i>Natrinema gari</i> JCM 14663                                                        |
| 804 clique | 2511231129 | <i>Vibrio sp.</i>                      | <i>Vibrio sp.</i> EJY3                                                                 |
| 804 clique | 2554235216 | <i>Vibrio natriegens</i>               | <i>Vibrio natriegens</i> RF-FC 7                                                       |
| 811 clique | 2554235460 | <i>Psychrobacter sp.</i>               | <i>Psychrobacter sp.</i> G                                                             |
| 811 clique | 637000227  | <i>Psychrobacter cryohalolentis</i>    | <i>Psychrobacter cryohalolentis</i> K5                                                 |
| 813 clique | 649889910  | <i>Bacillus sp.</i>                    | <i>Bacillus sp.</i> BT1B_CT2                                                           |
| 813 clique | 639279303  | <i>Bacillus licheniformis</i>          | <i>Bacillus licheniformis</i> DSM 13 Goettingen                                        |
| 813 clique | 639279304  | <i>Bacillus licheniformis</i>          | <i>Bacillus licheniformis</i> DSM 13 Novozymes                                         |
| 813 clique | 2519899833 | <i>Bacillus licheniformis</i>          | <i>Bacillus licheniformis</i> WX-02                                                    |
| 813 clique | 2548877019 | <i>Bacillus licheniformis</i>          | <i>Bacillus licheniformis</i> 10-1-A                                                   |
| 813 clique | 2548877020 | <i>Bacillus licheniformis</i>          | <i>Bacillus licheniformis</i> 5-2-D                                                    |
| 813 clique | 2551306495 | <i>Bacillus licheniformis</i>          | <i>Bacillus licheniformis</i> CGMCC 3963                                               |
| 816 clique | 2548876977 | <i>Rhodococcus sp.</i>                 | <i>Rhodococcus sp.</i> P14                                                             |
| 816 clique | 2554235023 | <i>Rhodococcus ruber</i>               | <i>Rhodococcus ruber</i> Chol-4                                                        |
| 819 clique | 642791603  | <i>Geobacillus sp.</i>                 | <i>Geobacillus sp.</i> G11MC16                                                         |
| 819 clique | 640069312  | <i>Geobacillus thermodenitrificans</i> | <i>Geobacillus thermodenitrificans</i> NG80-2                                          |
| 819 clique | 2554235472 | <i>Geobacillus thermodenitrificans</i> | <i>Geobacillus thermodenitrificans</i> DSM 465                                         |
| 821 clique | 2513237386 | <i>Actinomyces sp.</i>                 | <i>Actinomyces sp.</i> F0330                                                           |
| 821 clique | 2541047505 | <i>Actinomyces johnsonii</i>           | <i>Actinomyces johnsonii</i> F0510                                                     |
| 821 clique | 2541048002 | <i>Actinomyces johnsonii</i>           | <i>Actinomyces johnsonii</i> F0542                                                     |
| 830 clique | 641736270  | <i>Clostridium sp.</i>                 | <i>Clostridium sp.</i> SS2/1                                                           |
| 830 clique | 649889957  | unclassified                           | Lachnospiraceae bacterium sp. 5_1_63FAA                                                |
| 830 clique | 650377990  | unclassified                           | Clostridiales sp. SSC/2                                                                |
| 830 clique | 2534681714 | <i>Anaerostipes hadrus</i>             | <i>Anaerostipes hadrus</i> comb. nov. VPI 82-52, DSM 3319                              |
| 834 clique | 646206272  | <i>Bacteroides sp.</i>                 | <i>Bacteroides sp.</i> 1_1_6                                                           |
| 834 clique | 648861000  | <i>Bacteroides sp.</i>                 | <i>Bacteroides sp.</i> 1_1_14                                                          |
| 834 clique | 637000026  | <i>Bacteroides thetaiotaomicron</i>    | <i>Bacteroides thetaiotaomicron</i> VPI-5482                                           |
| 834 clique | 2513020028 | <i>Bacteroides thetaiotaomicron</i>    | <i>Bacteroides thetaiotaomicron</i> NLAE-zl-C523 (Illumina Draft assembly with Velvet) |
| 834 clique | 2513020029 | <i>Bacteroides thetaiotaomicron</i>    | <i>Bacteroides thetaiotaomicron</i> NLAE-zl-P32 (Illumina Draft assembly with Velvet)  |
| 834 clique | 2513020032 | <i>Bacteroides thetaiotaomicron</i>    | <i>Bacteroides thetaiotaomicron</i> NLAE-zl-P699                                       |
| 834 clique | 2514885004 | <i>Bacteroides thetaiotaomicron</i>    | <i>Bacteroides thetaiotaomicron</i> NLAE-zl-G288                                       |
| 834 clique | 2515154063 | <i>Bacteroides thetaiotaomicron</i>    | <i>Bacteroides thetaiotaomicron</i> NLAE-zl-H207                                       |
| 834 clique | 2515154066 | <i>Bacteroides thetaiotaomicron</i>    | <i>Bacteroides thetaiotaomicron</i> NLAE-zl-H463                                       |
| 834 clique | 2515154067 | <i>Bacteroides thetaiotaomicron</i>    | <i>Bacteroides thetaiotaomicron</i> NLAE-zl-H492                                       |
| 843 clique | 2551306406 | <i>Vibrio sp.</i>                      | <i>Vibrio sp.</i> 712i1                                                                |
| 843 clique | 638341222  | <i>Vibrio alginolyticus</i>            | <i>Vibrio alginolyticus</i> 12G01                                                      |
| 843 clique | 647000332  | <i>Vibrio alginolyticus</i>            | <i>Vibrio alginolyticus</i> 40B                                                        |
| 844 clique | 651324008  | <i>Agrobacterium sp.</i>               | <i>Agrobacterium sp.</i> ATCC 31749                                                    |
| 844 clique | 639279301  | <i>Agrobacterium tumefaciens</i>       | <i>Agrobacterium tumefaciens</i> C58-UWash                                             |
| 844 clique | 639279302  | <i>Agrobacterium tumefaciens</i>       | <i>Agrobacterium tumefaciens</i> C58-UWash                                             |
| 847 clique | 649889921  | <i>Clostridium sp.</i>                 | <i>Clostridium sp.</i> HGF2                                                            |
| 847 clique | 2541047402 | <i>Clostridium sp.</i>                 | <i>Clostridium difficile</i> P28                                                       |
| 847 clique | 2513237332 | unclassified                           | Erysipelotrichaceae bacterium sp. 21_3                                                 |
| 847 clique | 2513237345 | unclassified                           | Erysipelotrichaceae sp. 2_2_44A                                                        |
| 847 clique | 2531839268 | unclassified                           | Erysipelotrichaceae bacterium sp. 6_1_45                                               |
| 847 clique | 2534682210 | <i>Clostridium innocuum</i>            | <i>Clostridium innocuum</i> 2959                                                       |
| 858 clique | 646206253  | <i>Fusobacterium sp.</i>               | <i>Fusobacterium sp.</i> 4_1_13                                                        |
| 858 clique | 647533169  | <i>Fusobacterium sp.</i>               | <i>Fusobacterium sp.</i> 3_1_27                                                        |
| 858 clique | 647533171  | <i>Fusobacterium sp.</i>               | <i>Fusobacterium sp.</i> 3_1_36A2                                                      |
| 858 clique | 2554235746 | <i>Fusobacterium sp.</i>               | <i>Fusobacterium sp.</i> 3_1_36A2                                                      |
| 858 clique | 638341097  | <i>Fusobacterium nucleatum</i>         | <i>Fusobacterium nucleatum</i> vincentii ATCC 49256                                    |
| 858 clique | 2519899747 | <i>Fusobacterium nucleatum</i>         | <i>Fusobacterium nucleatum</i> fusiforme ATCC 51190                                    |
| 858 clique | 2554235041 | <i>Fusobacterium nucleatum</i>         | <i>Fusobacterium nucleatum</i> vincentii ChDC F8                                       |
| 875 clique | 2524614673 | <i>Streptomyces sp.</i>                | <i>Streptomyces sp.</i> PgraA7                                                         |
| 875 clique | 645058822  | <i>Streptomyces roseosporus</i>        | <i>Streptomyces roseosporus</i> NRRL 15998                                             |
| 875 clique | 645058827  | <i>Streptomyces roseosporus</i>        | <i>Streptomyces roseosporus</i> NRRL 11379                                             |
| 885 clique | 651324049  | unclassified                           | Lachnospiraceae bacterium 2_1_58FAA                                                    |
| 885 clique | 640963057  | <i>Ruminococcus gnavus</i>             | <i>Ruminococcus gnavus</i> ATCC 29149                                                  |
| 886 clique | 649889909  | <i>Bacillus sp.</i>                    | <i>Bacillus sp.</i> 2_A_57_CT2                                                         |
| 886 clique | 2551306096 | <i>Bacillus oceanisediminis</i>        | <i>Bacillus oceanisediminis</i> 2691                                                   |
| 896 clique | 2524614873 | <i>Teredinibacter sp.</i>              | <i>Teredinibacter sp.</i> 991H.S.0a.06                                                 |
| 896 clique | 2513237099 | <i>Teredinibacter turnerae</i>         | <i>Teredinibacter turnerae</i> T7902                                                   |
| 896 clique | 2519899663 | <i>Teredinibacter turnerae</i>         | <i>Teredinibacter turnerae</i> T0609                                                   |
| 896 clique | 2519899664 | <i>Teredinibacter turnerae</i>         | <i>Teredinibacter turnerae</i> T8412                                                   |
| 896 clique | 2523533596 | <i>Teredinibacter turnerae</i>         | <i>Teredinibacter turnerae</i> T8513                                                   |
| 897 clique | 647533203  | unclassified                           | Rhodobacterales sp. Y4I                                                                |
| 897 clique | 2521172619 | <i>Phaeobacter daeponensis</i>         | <i>Phaeobacter daeponensis</i> TF-218, DSM 23529 (scaffold version)                    |
| 902 clique | 2551306348 | <i>Dickeya sp.</i>                     | <i>Dickeya chrysanthemi</i> NCPPB 516                                                  |
| 902 clique | 644736355  | <i>Dickeya zeae</i>                    | <i>Dickeya zeae</i> Ech1591                                                            |
| 908 clique | 2548876840 | <i>Anaerococcus sp.</i>                | <i>Anaerococcus sp.</i> ph10                                                           |
| 908 clique | 645058761  | <i>Anaerococcus vaginalis</i>          | <i>Anaerococcus vaginalis</i> ATCC 51170                                               |
| 912 clique | 2551306658 | unclassified                           | Herbaspirillum sp. B39                                                                 |
| 912 clique | 2551306420 | <i>Herbaspirillum huttiense</i>        | <i>Herbaspirillum huttiense</i> putei IAM 15032                                        |
| 938 clique | 2513237367 | <i>Clostridium sp.</i>                 | <i>Clostridium sp.</i> 7_3_54FAA                                                       |
| 938 clique | 649889922  | <i>Clostridium symbiosum</i>           | <i>Clostridium symbiosum</i> WAL-14163                                                 |
| 938 clique | 649889923  | <i>Clostridium symbiosum</i>           | <i>Clostridium symbiosum</i> WAL-14673                                                 |
| 945 clique | 2510065064 | <i>Pseudoxanthomonas sp.</i>           | <i>Pseudoxanthomonas sp.</i> J31                                                       |
| 945 clique | 2551306371 | <i>Pseudoxanthomonas sp.</i>           | <i>Pseudoxanthomonas sp.</i> GW2                                                       |
| 945 clique | 2505679064 | <i>Pseudoxanthomonas taiwanensis</i>   | <i>Pseudoxanthomonas taiwanensis</i> J19                                               |
| 948 clique | 2548877171 | <i>Bacteroides sp.</i>                 | <i>Bacteroides sp.</i> 14(A)                                                           |

|             |            |                              |                                                   |
|-------------|------------|------------------------------|---------------------------------------------------|
| 948 clique  | 643886111  | Bacteroides cellulosilyticus | Bacteroides cellulosilyticus DSM 14838            |
| 948 clique  | 2531839301 | Bacteroides cellulosilyticus | Bacteroides cellulosilyticus CL02T12C19           |
| 955 clique  | 639633003  | Acidovorax sp.               | Acidovorax sp. JS42                               |
| 955 clique  | 643348541  | Acidovorax ebreus            | Acidovorax ebreus TPSY                            |
| 958 clique  | 2534682224 | Lactobacillus sp.            | Lactobacillus sp. 66c                             |
| 958 clique  | 2537562121 | Lactobacillus equicursoris   | Lactobacillus equicursoris CIP 110162             |
| 960 clique  | 2541047028 | Ralstonia sp.                | Ralstonia sp. GA3-3                               |
| 960 clique  | 640427136  | Ralstonia eutropha           | Ralstonia eutropha H16                            |
| 978 clique  | 649633068  | Methylovorus sp.             | Methylovorus sp. MP688                            |
| 978 clique  | 644736389  | Methylovorus glucosetrophus  | Methylovorus glucosetrophus SIP3-4                |
| 993 clique  | 645951850  | Fusobacterium sp.            | Fusobacterium sp. D12                             |
| 993 clique  | 2531839544 | Fusobacterium necrophorum    | Fusobacterium necrophorum Fnf1007                 |
| 993 clique  | 2537561963 | Fusobacterium necrophorum    | Fusobacterium necrophorum funduliforme ATCC 51357 |
| 995 clique  | 2548876792 | Xanthomonas sp.              | Xanthomonas sp. NCPPB 1132                        |
| 995 clique  | 2548876789 | Xanthomonas sacchari         | Xanthomonas sacchari NCPPB 4393                   |
| 1009 clique | 2545824673 | Enterococcus sp.             | Enterococcus flavescens ATCC 49996                |
| 1009 clique | 647533127  | Enterococcus casseliflavus   | Enterococcus casseliflavus EC10                   |
| 1009 clique | 647533128  | Enterococcus casseliflavus   | Enterococcus casseliflavus EC20                   |
| 1009 clique | 647533129  | Enterococcus casseliflavus   | Enterococcus casseliflavus EC30                   |
| 1009 clique | 2540341159 | Enterococcus casseliflavus   | Enterococcus casseliflavus EC20                   |
| 1009 clique | 2541047578 | Enterococcus casseliflavus   | Enterococcus casseliflavus 14-MB-W-14             |
