# Supplementary material for: Microbial species delineation using whole genome sequences
Source: PubMed Central journal article supplement (PMC4538840; doi:10.1093/nar/gkv657), 2015-07-06
Supplement: supp_gkv657_nar-03569-n-2014-File008.pdf [file supp_gkv657_nar-03569-n-2014-File008.pdf]

**Dataset S2: 109 cliques and 4 clique groups that are populated entirely by genomes without any species definitions are putative novel species**

| Cluster ID | Cluster type | Species present in clique (number of genomes of each species) |
|------------|--------------|---------------------------------------------------------------|
| 8          | clique-group | unclassified(3)                                               |
| 14         | clique       | Thioalkalivibrio sp.(11)                                      |
| 23         | clique       | Thioalkalivibrio sp.(3)                                       |
| 31         | clique       | Burkholderia sp.(2)                                           |
| 65         | clique       | Streptomyces sp.(5)                                           |
| 90         | clique       | Streptomyces sp.(3)                                           |
| 101        | clique       | Ancylobacter sp.(1),unclassified(1)                           |
| 105        | clique       | Eubacterium sp.(2)                                            |
| 112        | clique       | unclassified(2)                                               |
| 117        | clique       | Pseudoalteromonas sp.(2)                                      |
| 139        | clique       | Burkholderia sp.(2)                                           |
| 156        | clique       | unclassified(1),Sulfurimonas sp.(1)                           |
| 179        | clique       | unclassified(2)                                               |
| 193        | clique       | Rhodococcus sp.(2)                                            |
| 196        | clique       | Thioalkalivibrio sp.(2)                                       |
| 197        | clique       | Selenomonas sp.(2)                                            |
| 199        | clique       | Pseudomonas sp.(3)                                            |
| 207        | clique       | Butyrivibrio sp.(2)                                           |
| 210        | clique       | Thioalkalivibrio sp.(3)                                       |
| 228        | clique       | Rhizobium sp.(3)                                              |
| 234        | clique       | Thioalkalivibrio sp.(11)                                      |
| 283        | clique       | Pseudoalteromonas sp.(3)                                      |
| 296        | clique       | unclassified(2),Coprococcus sp.(2)                            |
| 306        | clique       | Pseudomonas sp.(3)                                            |
| 309        | clique       | unclassified(2)                                               |
| 321        | clique       | Pseudoalteromonas sp.(2)                                      |
| 338        | clique       | Mycobacterium sp.(3)                                          |
| 347        | clique       | unclassified(2)                                               |
| 348        | clique       | Arthrobacter sp.(2)                                           |
| 372        | clique       | Streptomyces sp.(4)                                           |
| 375        | clique       | unclassified(2)                                               |
| 385        | clique       | Bacillus sp.(2)                                               |
| 388        | clique       | Methylophilus sp.(2)                                          |
| 391        | clique       | Paenibacillus sp.(2)                                          |
| 392        | clique       | Cyanothece sp.(2)                                             |
| 398        | clique       | Enterobacter sp.(2)                                           |
| 401        | clique       | Dehalobacter sp.(2)                                           |
| 403        | clique       | Methanobrevibacter sp.(2)                                     |

|     |              |                                                                 |
|-----|--------------|-----------------------------------------------------------------|
| 405 | clique       | <i>Pseudomonas</i> sp.(2)                                       |
| 418 | clique       | unclassified(2)                                                 |
| 424 | clique       | unclassified(2)                                                 |
| 429 | clique       | <i>Streptomyces</i> sp.(5)                                      |
| 457 | clique       | <i>Actinomyces</i> sp.(2)                                       |
| 461 | clique       | <i>Hyphomicrobium</i> sp.(2)                                    |
| 466 | clique       | <i>Vibrio</i> sp.(4)                                            |
| 467 | clique-group | <i>Streptococcus</i> sp.(6)                                     |
| 485 | clique       | <i>Butyrivibrio</i> sp.(2)                                      |
| 494 | clique       | <i>Blattabacterium</i> sp.(2)                                   |
| 497 | clique       | <i>Synechocystis</i> sp.(6)                                     |
| 499 | clique       | <i>Nocardioides</i> sp.(2)                                      |
| 514 | clique       | <i>Sulfitobacter</i> sp.(2)                                     |
| 520 | clique       | <i>Thioalkalivibrio</i> sp.(12)                                 |
| 521 | clique       | unclassified(1), <i>Methylotenera</i> sp.(1)                    |
| 537 | clique-group | unclassified(10)                                                |
| 545 | clique       | unclassified(4)                                                 |
| 556 | clique       | unclassified(2)                                                 |
| 565 | clique       | <i>Thioalkalivibrio</i> sp.(7)                                  |
| 579 | clique       | <i>Streptococcus</i> sp.(2)                                     |
| 592 | clique-group | unclassified(6)                                                 |
| 596 | clique       | <i>Streptomyces</i> sp.(3)                                      |
| 601 | clique       | <i>Butyrivibrio</i> sp.(2)                                      |
| 624 | clique       | <i>Actinomyces</i> sp.(1), <i>Atopobium</i> sp.(1)              |
| 625 | clique       | <i>Agrobacterium</i> sp.(3)                                     |
| 647 | clique       | <i>Aminobacter</i> sp.(3)                                       |
| 649 | clique       | <i>Thauera</i> sp.(2)                                           |
| 657 | clique       | unclassified(2)                                                 |
| 660 | clique       | <i>Mycobacterium</i> sp.(2)                                     |
| 675 | clique       | <i>Shewanella</i> sp.(2)                                        |
| 678 | clique       | <i>Butyrivibrio</i> sp.(2)                                      |
| 708 | clique       | unclassified(2)                                                 |
| 711 | clique       | <i>Burkholderia</i> sp.(2)                                      |
| 722 | clique       | <i>Bradyrhizobium</i> sp.(2)                                    |
| 730 | clique       | unclassified(2)                                                 |
| 748 | clique       | <i>Pseudomonas</i> sp.(3)                                       |
| 760 | clique       | <i>Clostridium</i> sp.(1), <i>Candidatus Arthromitus</i> sp.(5) |
| 763 | clique       | <i>Pseudomonas</i> sp.(2)                                       |
| 772 | clique       | <i>Pseudomonas</i> sp.(7)                                       |
| 776 | clique       | <i>Paracoccus</i> sp.(3)                                        |
| 790 | clique       | <i>Hydrogenobaculum</i> sp.(4)                                  |

|      |        |                                                        |
|------|--------|--------------------------------------------------------|
| 792  | clique | unclassified(2)                                        |
| 808  | clique | Xanthomonas sp.(3)                                     |
| 809  | clique | Bacillus sp.(2)                                        |
| 814  | clique | Synechococcus sp.(4)                                   |
| 838  | clique | Thioalkalivibrio sp.(3)                                |
| 850  | clique | Blattabacterium sp.(2)                                 |
| 853  | clique | unclassified(1),Eubacterium sp.(1)                     |
| 854  | clique | Thioalkalivibrio sp.(2)                                |
| 862  | clique | Pseudomonas sp.(4)                                     |
| 865  | clique | Olleya sp.(2)                                          |
| 872  | clique | Rhodanobacter sp.(4)                                   |
| 878  | clique | Pseudomonas sp.(2)                                     |
| 884  | clique | Methylobacterium sp.(2)                                |
| 914  | clique | Methyloversatilis sp.(1),unclassified(1)               |
| 918  | clique | unclassified(2)                                        |
| 921  | clique | Oribacterium sp.(2)                                    |
| 922  | clique | unclassified(2)                                        |
| 923  | clique | Paracoccus sp.(2)                                      |
| 931  | clique | unclassified(2)                                        |
| 934  | clique | Thioalkalivibrio sp.(2)                                |
| 935  | clique | Methylobacterium sp.(2)                                |
| 939  | clique | unclassified(1),Chloroflexus sp.(1)                    |
| 944  | clique | Streptomyces sp.(2)                                    |
| 949  | clique | Eubacteriaceae bacterium sp.(1),Eubacterium sp.(1)     |
| 951  | clique | Arenimonas sp.(1),Rhizobacter sp.(1),Lysobacter sp.(1) |
| 961  | clique | Ralstonia sp.(2)                                       |
| 963  | clique | Cyanothece sp.(2)                                      |
| 972  | clique | Ruminococcus sp.(1),Blautia sp.(1)                     |
| 975  | clique | Luteimonas sp.(2)                                      |
| 983  | clique | Arcobacter sp.(2)                                      |
| 987  | clique | Desulfovibrio sp.(2)                                   |
| 996  | clique | Pseudomonas sp.(2)                                     |
| 1011 | clique | Coprobacillus sp.(2)                                   |
| 1012 | clique | Cryocola sp.(1),Leifsonia sp.(1)                       |
